# Supplementary material for: Noteworthy Facts about a Methane-Producing Microbial Community Processing Acidic Effluent from Sugar Beet Molasses Fermentation
Source: PLoS One. 2015 May 22;10(5):e0128008. doi: 10.1371/journal.pone.0128008 (PMC4441513; doi:10.1371/journal.pone.0128008)
Supplement: S2 Table — In addition, KO groups were mapped to EC numbers for selected enzymes putatively involved in methane metabolism (including intermediate and substrate production). (XLS) [file pone.0128008.s003.xls]

## Sheet: MODULES
ID	NAME	maslowy,rapsearch,28kegg-hit-keg-mpm-cop-nul-nve-nve
InverseSimpson	InverseSimpson	35.343
Shannon	Shannon	3.68638
Pielou	Pielou	0.736694
Richness	Richness	1
MODULE	MODULE DESCRIPTION	REL. ABUNDANCE
M00171	M00171: C4-dicarboxylic acid cycle, NAD+ -malic enzyme type	0
M00173	M00173: Reductive citric acid cycle (Arnon-Buchanan cycle)	0
M00172	M00172: C4-dicarboxylic acid cycle, NADP+ -malic enzyme type	0
M00174	M00174: Methane oxidation, methylotroph, methane => CO2	2.38258e-10
M00176	M00176: Sulfur reduction, sulfate => H2S	0
M00179	M00179: Ribosome, archaea	0
M00178	M00178: Ribosome, bacteria	0.0382802
M00079	M00079: Keratan sulfate degradation	0
M00072	M00072: Oligosaccharyltransferase	0
M00276	M00276: PTS system, mannose-specific II component	0.000446675
M00277	M00277: PTS system, N-acetylgalactosamine-specific II component	6.12423e-07
M00377	M00377: Reductive acetyl-CoA pathway (Wood-Ljungdahl pathway)	0
M00376	M00376: 3-Hydroxypropionate bicycle	0
M00375	M00375: Hydroxypropionate-hydroxybutylate cycle	0
M00374	M00374: Dicarboxylate-hydroxybutyrate cycle	0
M00373	M00373: Ethylmalonyl pathway	0
M00278	M00278: PTS system, sorbose-specific II component	0
M00346	M00346: Formaldehyde assimilation, serine pathway	0
M00064	M00064: ADP-L-glycero-D-manno-heptose biosynthesis	0.0187786
M00149	M00149: Complex II (succinate dehydrogenase / fumarate reductase), succinate dehydrogenase	4.7854e-06
M00061	M00061: Uronic acid metabolism	4.20715e-06
M00060	M00060: Lipopolysaccharide biosynthesis, KDO2-lipid A	0
M00144	M00144: Complex I (NADH dehydrogenase), NADH dehydrogenase I	0.0194312
M00145	M00145: Complex I (NADH dehydrogenase), NADH dehydrogenase I/diaphorase subunit of the bidirectional hydrogenase	0
M00342	M00342: Bacterial proteasome	6.72749e-08
M00136	M00136: GABA biosynthesis, prokaryotes, putrescine => GABA	0
M00260	M00260: DNA polymerase III complex, bacteria	0
M00300	M00300: Putrescine transport system	0.000112292
M00304	M00304: PTS system, fructose-specific II component	0
M00096	M00096: C5 isoprenoid biosynthesis, non-mevalonate pathway	0.0296662
M00012	M00012: Glyoxylate cycle	6.33587e-11
M00013	M00013: Malonate semialdehyde pathway, propanoyl-CoA => Acetyl-CoA	0
M00011	M00011: Citrate cycle, second carbon oxidation	8.38606e-05
M00016	M00016: Lysine biosynthesis, aspartate => lysine	0.022323
M00017	M00017: Methionine biosynthesis, apartate => homoserine => methionine	0.0188963
M00014	M00014: Glucuronate pathway (uronate pathway)	0
M00152	M00152: Complex III (Cytochrome bc1 complex)	0
M00018	M00018: Threonine biosynthesis, apartate => homoserine => threonine	0.0196293
M00019	M00019: Leucine biosynthesis, pyruvate => 2-oxoisovalerate => leucine	0
M00157	M00157: F-type ATPase, bacteria	0.009947
M00156	M00156: Complex IV (Cytochrome c oxidase), cytochrome c oxidase, cbb3-type	0
M00155	M00155: Complex IV (Cytochrome c oxidase), cytochrome o ubiquinol oxidase/cytochrome c oxidase/quinol oxidase polypeptide	0
M00154	M00154: Complex IV (Cytochrome c oxidase), cytochrome c oxidase	0
M00348	M00348: Glutathione transport system	0.000143091
M00349	M00349: Microcin C transport system	2.83929e-06
M00311	M00311: 2-oxoglutarate:ferredoxin oxidoreductase	0.0289792
M00317	M00317: Manganese/iron transport system	3.03165e-15
M00095	M00095: C5 isoprenoid biosynthesis, mevalonate pathway	3.32438e-09
M00028	M00028: Ornithine biosynthesis, glutamate => ornithine	0.0202866
M00001	M00001: Glycolysis (Embden-Meyerhof pathway), glucose => pyruvate	0.0396745
M00003	M00003: Gluconeogenesis, oxaloacetate => fructose-6P	0.0276659
M00002	M00002: Glycolysis, core module involving three-carbon compounds	0.0408033
M00004	M00004: Pentose phosphate pathway (Pentose phosphate cycle)	0.0213301
M00007	M00007: Pentose phosphate pathway, non-oxidative phase, fructose 6P => ribose 5P	0.0360767
M00006	M00006: Pentose phosphate pathway, oxidative phase, glucose 6P => ribulose 5P	0.0151406
M00009	M00009: Citrate cycle (TCA cycle, Krebs cycle)	0.000115137
M00008	M00008: Entner-Doudoroff pathway, glucose-6P => glyceraldehyde-3P + pyruvate	2.50582e-06
M00324	M00324: Dipeptide transport system	0.00286362
M00326	M00326: RTX toxin transport system	3.08413e-07
M00129	M00129: Ascorbate biosynthesis, animals, glucose-1P => ascorbate	0
M00126	M00126: Tetrahydrofolate biosynthesis, GTP => THF	0.0141157
M00127	M00127: Thiamine biosynthesis, AIR => thiamine-P/thiamine-2P	0.0153514
M00124	M00124: Pyridoxal biosynthesis, erythrose-4P => pyridoxal-5P	6.54073e-05
M00125	M00125: Riboflavin biosynthesis, GTP => riboflavin/FMN/FAD	0.033796
M00123	M00123: Biotin biosynthesis, pimeloyl-CoA => biotin	0.00769567
M00121	M00121: Heme biosynthesis, glutamate => protoheme/siroheme	0.00289797
M00089	M00089: Triacylglycerol biosynthesis	0
M00088	M00088: Ketone body biosynthesis, acetyl-CoA => acetoacetate/3-hydroxybutyrate/acetone	0
M00080	M00080: Lipopolysaccharide biosynthesis, inner core => outer core => O-antigen	0
M00082	M00082: Fatty acid biosynthesis, initiation	0
M00049	M00049: Adenine nucleotide biosynthesis, IMP => ADP/dADP,ATP/dATP	0.0316451
M00206	M00206: Cellobiose transport system	4.1393e-264
M00038	M00038: Tryptophan metabolism, tryptophan => kynurenine => 2-aminomuconate	0
M00034	M00034: Methionine salvage pathway	1.64801e-07
M00035	M00035: Methionine degradation	0.0197084
M00036	M00036: Leucine degradation, leucine => acetoacetate + acetyl-CoA	0.000237061
M00159	M00159: V-type ATPase, prokaryotes	0.00011575
M00032	M00032: Lysine degradation, lysine => saccharopine => acetoacetyl-CoA	0
M00033	M00033: Ectoine biosynthesis	0
M00333	M00333: Type IV secretion system	0
M00332	M00332: Type III secretion system	0
M00331	M00331: Type II general secretion system	0
M00336	M00336: Twin-arginine translocation (Tat) system	1.39266e-59
M00335	M00335: Sec (secretion) system	0
M00334	M00334: Type VI secretion system	0
M00131	M00131: Inositol phosphate metabolism, Ins(1,3,4,5)P4 => Ins(1,3,4)P3 => myo-inositol	0
M00133	M00133: Polyamine biosynthesis, arginine => agmatine => putrescine => spermidine	0.00987987
M00239	M00239: Peptides/nickel transport system	0.0139806
M00232	M00232: General L-amino acid transport system	2.00442e-09
M00233	M00233: Glutamate transport system	2.40354e-09
M00230	M00230: Glutamate/aspartate transport system	4.50085e-08
M00237	M00237: Branched-chain amino acid transport system	0.0159567
M00235	M00235: Arginine/ornithine transport system	5.24216e-12
M00029	M00029: Urea cycle	0
M00150	M00150: Complex II (succinate dehydrogenase / fumarate reductase), fumarate reductase	2.45561e-08
M00022	M00022: Shikimate pathway, phosphoenolpyruvate + erythrose-4P => chorismate	0.0284668
M00026	M00026: Histidine biosynthesis, PRPP => histidine	0.0149673
M00025	M00025: Tyrosine biosynthesis, chorismate => tyrosine	6.1873e-07
M00105	M00105: Bile acid biosynthesis, cholesterol => chenodeoxycholate	0
M00229	M00229: Arginine transport system	8.80948e-16
M00347	M00347: Methanogenesis, formate => methane	0
M00184	M00184: RNA polymerase, archaea	0
M00185	M00185: Sulfate transport system	0.00016449
M00225	M00225: Lysine/arginine/ornithine transport system	1.29392e-74
M00226	M00226: Histidine transport system	1.29392e-74
M00246	M00246: Nickel transport system	0
M00245	M00245: Cobalt transport system	0.0149629
M00117	M00117: Ubiquinone biosynthesis, prokaryotes, chorismate => ubiquinone	1.88608e-16
M00116	M00116: Menaquinone biosynthesis, chorismate => menaquinone	0
M00115	M00115: NAD biosynthesis, aspartate => NAD	0.0357378
M00114	M00114: Ascorbate biosynthesis, plants, glucose-6P => ascorbate	0
M00299	M00299: Spermidine/putrescine transport system	0.0139907
M00295	M00295: BRCA1-associated genome surveillance complex (BASC)	0
M00290	M00290: Holo-TFIIH complex	0
M00119	M00119: Pantothenate biosynthesis, valine/L-aspartate => pantothenate	0.0262941
M00122	M00122: Cobalamin biosynthesis, cobinamide => cobalamin	0
M00219	M00219: AI-2 transport system	8.8675e-05
M00050	M00050: Guanine nucleotide biosynthesis, IMP => GDP/dGDP,GTP/dGTP	0.0319142
M00051	M00051: Uridine monophosphate biosynthesis, glutamine (+ PRPP) => UMP	0.0420173
M00350	M00350: Capsaicin biosynthesis, L-Phenylalanine => Capsaicin	0
M00199	M00199: Lactose/L-arabinose transport system	0
M00198	M00198: sn-Glycerol 3-phosphate transport system	0.00675742
M00197	M00197: Putative sugar transport system	0.00345133
M00194	M00194: Maltose/maltodextrin transport system	0.00207156
M00359	M00359: Aminoacyl-tRNA biosynthesis, eukaryotes	0.0489579
M00358	M00358: Coenzyme M biosynthesis	0
M00053	M00053: Pyrimidine deoxyribonuleotide biosynthesis, CDP/CTP => dCDP/dCTP,dTDP/dTTP	0.0205608
M00319	M00319: Manganese/zinc/iron transport system	7.54402e-07
M00193	M00193: Putative spermidine/putrescine transport system	0.00113518
M00166	M00166: Reductive pentose phosphate cycle, RuBP + CO2 => glyceraldehyde-3P	0
M00167	M00167: Reductive pentose phosphate cycle, glyceraldehyde-3P => RuBP	0
M00164	M00164: ATP synthase	0.009947
M00165	M00165: Reductive pentose phosphate cycle (Calvin cycle)	0
M00287	M00287: PTS system, galactosamine-specific II component	3.04911e-06
M00202	M00202: Oligogalacturonide transport system	1.23324e-06
M00201	M00201: alpha-Glucoside transport system	0
M00200	M00200: Sorbitol/mannitol transport system	4.70829e-10
M00207	M00207: Multiple sugar transport system	0.0120545
M00048	M00048: Inosine monophosphate biosynthesis, PRPP + glutamine => IMP	0.0206434
M00045	M00045: Histidine degradation, histidine => N-formiminoglutamate => glutamate	0.00771401
M00044	M00044: Tyrosine degradation, tyrosine => homogentisate	0
M00046	M00046: beta-Alanine biosynthesis, cytosine / uracil => beta-alanine	4.85534e-10
M00042	M00042: Catecholamine biosynthesis, tyrosine => dopamine => noradrenaline => adrenaline	0
M00360	M00360: Aminoacyl-tRNA biosynthesis, prokaryotes	0.0491124
M00361	M00361: Nucleotide sugar biosynthesis, eukaryotes	0
M00362	M00362: Nucleotide sugar biosynthesis, prokaryotes	0
M00366	M00366: C10-C20 isoprenoid biosynthesis, plants	0
M00310	M00310: Pyruvate:ferredoxin oxidoreductase	0.00468301
M00222	M00222: Phosphate transport system	0.028167

## Sheet: KO classes
ID	NAME	maslowy,rapsearch,28kegg-hit-keg-mpt-cop-nul-nve-nve
InverseSimpson	InverseSimpson	70.3027
Shannon	Shannon	4.40989
Pielou	Pielou	0.904556
Richness	Richness	1
MODULE	MODULE DESCRIPTION	REL. ABUNDANCE
ko00564	ko00564: Glycerophospholipid metabolism	0.00455983
ko00680	ko00680: Methane metabolism	0.00710942
ko00562	ko00562: Inositol phosphate metabolism	0.00350468
ko00561	ko00561: Glycerolipid metabolism	0.00360363
ko00440	ko00440: Phosphonate and phosphinate metabolism	0.000685478
ko00250	ko00250: Alanine, aspartate and glutamate metabolism	0.0215654
ko00565	ko00565: Ether lipid metabolism	0.000238912
ko00740	ko00740: Riboflavin metabolism	0.0125348
ko00010	ko00010: Glycolysis / Gluconeogenesis	0.0143521
ko03450	ko03450: Non-homologous end-joining	0.000150488
ko00760	ko00760: Nicotinate and nicotinamide metabolism	0.014583
ko00920	ko00920: Sulfur metabolism	0.00788941
ko00311	ko00311: Penicillin and cephalosporin biosynthesis	0.000252148
ko00310	ko00310: Lysine degradation	0.00277772
ko04146	ko04146: Peroxisome	0.00252272
ko05100	ko05100: Bacterial invasion of epithelial cells	7.67254e-05
ko04141	ko04141: Protein processing in endoplasmic reticulum	0.00056404
ko02060	ko02060: Phosphotransferase system (PTS)	0.00184141
ko04712	ko04712: Circadian rhythm - plant	8.36418e-06
ko00511	ko00511: Other glycan degradation	0.00227921
ko00510	ko00510: N-Glycan biosynthesis	0.000811181
ko05110	ko05110: Vibrio cholerae infection	8.27638e-05
ko05111	ko05111: Vibrio cholerae pathogenic cycle	0.00103388
ko00860	ko00860: Porphyrin and chlorophyll metabolism	0.00775127
ko00450	ko00450: Selenocompound metabolism	0.0176142
ko00910	ko00910: Nitrogen metabolism	0.00754394
ko00300	ko00300: Lysine biosynthesis	0.0171991
ko00260	ko00260: Glycine, serine and threonine metabolism	0.0135143
ko00190	ko00190: Oxidative phosphorylation	0.00655167
ko03440	ko03440: Homologous recombination	0.0123201
ko00750	ko00750: Vitamin B6 metabolism	0.0152457
ko00061	ko00061: Fatty acid biosynthesis	0.0142338
ko03070	ko03070: Bacterial secretion system	0.0069844
ko00253	ko00253: Tetracycline biosynthesis	9.81917e-06
ko02040	ko02040: Flagellar assembly	0.00538128
ko00380	ko00380: Tryptophan metabolism	0.00317391
ko00500	ko00500: Starch and sucrose metabolism	0.00667487
ko05120	ko05120: Epithelial cell signaling in Helicobacter pylori infection	0.000729739
ko00625	ko00625: Chloroalkane and chloroalkene degradation	0.0071864
ko00624	ko00624: Polycyclic aromatic hydrocarbon degradation	0.0010659
ko00627	ko00627: Aminobenzoate degradation	0.001859
ko00620	ko00620: Pyruvate metabolism	0.0148862
ko00270	ko00270: Cysteine and methionine metabolism	0.0155515
ko01053	ko01053: Biosynthesis of siderophore group nonribosomal peptides	0.000379036
ko00943	ko00943: Isoflavonoid biosynthesis	1.27912e-09
ko00100	ko00100: Steroid biosynthesis	5.4403e-05
ko01056	ko01056: Biosynthesis of type II polyketide backbone	0.000193553
ko00071	ko00071: Fatty acid metabolism	0.00387733
ko00072	ko00072: Synthesis and degradation of ketone bodies	0.00047297
ko03060	ko03060: Protein export	0.012498
ko04910	ko04910: Insulin signaling pathway	0.00116153
ko00360	ko00360: Phenylalanine metabolism	0.00545823
ko00633	ko00633: Nitrotoluene degradation	0.00154884
ko00630	ko00630: Glyoxylate and dicarboxylate metabolism	0.00666686
ko00363	ko00363: Bisphenol degradation	0.000355254
ko00430	ko00430: Taurine and hypotaurine metabolism	0.0101036
ko02010	ko02010: ABC transporters	0.00692077
ko00130	ko00130: Ubiquinone and other terpenoid-quinone biosynthesis	0.00464482
ko00361	ko00361: Chlorocyclohexane and chlorobenzene degradation	6.58403e-05
ko00040	ko00040: Pentose and glucuronate interconversions	0.00828858
ko00730	ko00730: Thiamine metabolism	0.0205368
ko00362	ko00362: Benzoate degradation	0.00212185
ko01040	ko01040: Biosynthesis of unsaturated fatty acids	0.0019749
ko03018	ko03018: RNA degradation	0.00873044
ko00281	ko00281: Geraniol degradation	0.00168556
ko00280	ko00280: Valine, leucine and isoleucine degradation	0.00588784
ko03013	ko03013: RNA transport	0.00123938
ko03010	ko03010: Ribosome	0.0263981
ko03015	ko03015: mRNA surveillance pathway	0.000394721
ko00312	ko00312: beta-Lactam resistance	0.000145117
ko05143	ko05143: African trypanosomiasis	0.000304578
ko00520	ko00520: Amino sugar and nucleotide sugar metabolism	0.0102673
ko00521	ko00521: Streptomycin biosynthesis	0.0199425
ko00052	ko00052: Galactose metabolism	0.00651064
ko00053	ko00053: Ascorbate and aldarate metabolism	0.00292127
ko00051	ko00051: Fructose and mannose metabolism	0.0102061
ko00400	ko00400: Phenylalanine, tyrosine and tryptophan biosynthesis	0.0116722
ko00350	ko00350: Tyrosine metabolism	0.0045912
ko00480	ko00480: Glutathione metabolism	0.00469206
ko00640	ko00640: Propanoate metabolism	0.00947683
ko00720	ko00720: Carbon fixation pathways in prokaryotes	0.0166025
ko00960	ko00960: Tropane, piperidine and pyridine alkaloid biosynthesis	0.00718506
ko02020	ko02020: Two-component system	0.00558777
ko03008	ko03008: Ribosome biogenesis in eukaryotes	0.00137108
ko00290	ko00290: Valine, leucine and isoleucine biosynthesis	0.0317423
ko03410	ko03410: Base excision repair	0.0101848
ko00410	ko00410: beta-Alanine metabolism	0.00522329
ko00983	ko00983: Drug metabolism - other enzymes	0.0176876
ko05150	ko05150: Staphylococcus aureus infection	0.000331435
ko00791	ko00791: Atrazine degradation	0.000937625
ko00790	ko00790: Folate biosynthesis	0.0097135
ko00020	ko00020: Citrate cycle (TCA cycle)	0.0152311
ko00710	ko00710: Carbon fixation in photosynthetic organisms	0.0201741
ko00340	ko00340: Histidine metabolism	0.0187992
ko00550	ko00550: Peptidoglycan biosynthesis	0.0155078
ko00650	ko00650: Butanoate metabolism	0.00887355
ko03030	ko03030: DNA replication	0.0101457
ko02030	ko02030: Bacterial chemotaxis	0.00863247
ko04621	ko04621: NOD-like receptor signaling pathway	0.000512055
ko04626	ko04626: Plant-pathogen interaction	0.00181846
ko00460	ko00460: Cyanoamino acid metabolism	0.0086105
ko00780	ko00780: Biotin metabolism	0.0100172
ko00785	ko00785: Lipoic acid metabolism	0.0144847
ko00030	ko00030: Pentose phosphate pathway	0.0176729
ko00230	ko00230: Purine metabolism	0.0113077
ko04122	ko04122: Sulfur relay system	0.0146299
ko00540	ko00540: Lipopolysaccharide biosynthesis	0.0119305
ko04974	ko04974: Protein digestion and absorption	8.77473e-06
ko03022	ko03022: Basal transcription factors	0.000707988
ko00660	ko00660: C5-Branched dibasic acid metabolism	0.020133
ko03020	ko03020: RNA polymerase	0.00825023
ko00140	ko00140: Steroid hormone biosynthesis	0.000505025
ko00330	ko00330: Arginine and proline metabolism	0.00957507
ko00908	ko00908: Zeatin biosynthesis	0.00737932
ko00909	ko00909: Sesquiterpenoid biosynthesis	1.98506e-11
ko03430	ko03430: Mismatch repair	0.012545
ko00906	ko00906: Carotenoid biosynthesis	0.000440524
ko00900	ko00900: Terpenoid backbone biosynthesis	0.0166832
ko00903	ko00903: Limonene and pinene degradation	0.000144638
ko00471	ko00471: D-Glutamine and D-glutamate metabolism	0.0213245
ko00473	ko00473: D-Alanine metabolism	0.0118951
ko00970	ko00970: Aminoacyl-tRNA biosynthesis	0.0239676
ko04210	ko04210: Apoptosis	0.000100614
ko00240	ko00240: Pyrimidine metabolism	0.0144021
ko04113	ko04113: Meiosis - yeast	3.8014e-05
ko03420	ko03420: Nucleotide excision repair	0.0084866
ko00770	ko00770: Pantothenate and CoA biosynthesis	0.0191294
ko00670	ko00670: One carbon pool by folate	0.0206099
ko03050	ko03050: Proteasome	0.000914979
ko00930	ko00930: Caprolactam degradation	0.000442668
ko04112	ko04112: Cell cycle - Caulobacter	0.0165075

## Sheet: IndividualGenes
ID	NAME	maslowy,rapsearch,28kegg-hit-keg-cat
InverseSimpson	InverseSimpson	1200.33
Shannon	Shannon	7.49522
Pielou	Pielou	0.89454
Richness	Richness	1
MODULE	MODULE DESCRIPTION	REL. ABUNDANCE
K00184	K00184: molybdopterin oxidoreductase, iron-sulfur binding subunit	0.00010195
K00180	K00180: indolepyruvate ferredoxin oxidoreductase, beta subunit	2.96565e-06
K07168	K07168: CBS domain-containing membrane protein	7.66461e-07
K01361	K01361: lactocepin	9.33726e-06
K01362	K01362	0.00116452
K10110	K10110: maltose/maltodextrin transport system permease protein	0.000247191
K10111	K10111: maltose/maltodextrin transport system ATP-binding protein	4.97276e-05
K10112	K10112: maltose/maltodextrin transport system ATP-binding protein	0.000374043
K10117	K10117: multiple sugar transport system substrate-binding protein	6.65815e-05
K10118	K10118: multiple sugar transport system permease protein	0.000251467
K10119	K10119: multiple sugar transport system permease protein	0.000109319
K04642	K04642: halorhodopsin	3.26655e-05
K00791	K00791: tRNA delta(2)-isopentenylpyrophosphate transferase	0.00085171
K05844	K05844: ribosomal protein S6 modification protein	1.99063e-05
K05845	K05845: osmoprotectant transport system substrate-binding protein	0.0001041
K05846	K05846: osmoprotectant transport system permease protein	0.000195206
K08567	K08567: hydrogenase 2 maturation protease	7.32404e-05
K04083	K04083: molecular chaperone Hsp33	0.000243705
K04082	K04082: molecular chaperone HscB	2.92102e-06
K04081	K04081: molecular chaperone IbpB	9.58336e-06
K04087	K04087: membrane protease subunit HflC	0.000102558
K04086	K04086: ATP-dependent Clp protease ATP-binding subunit ClpL	5.2277e-06
K04085	K04085: tRNA 2-thiouridine synthesizing protein A	0.00033003
K04084	K04084: thiol:disulfide interchange protein DsbD	7.70933e-05
K00500	K00500: phenylalanine-4-hydroxylase	1.30577e-05
K04088	K04088: membrane protease subunit HflK	0.000220461
K00507	K00507: stearoyl-CoA desaturase (delta-9 desaturase)	8.59132e-06
K00989	K00989: ribonuclease PH	0.000360122
K01101	K01101: 4-nitrophenyl phosphatase	9.25521e-05
K00982	K00982: glutamate-ammonia-ligase adenylyltransferase	3.70787e-05
K01104	K01104: protein-tyrosine phosphatase	0.000639067
K00980	K00980: glycerol-3-phosphate cytidylyltransferase	0.000139219
K00981	K00981: phosphatidate cytidylyltransferase	0.000394086
K05592	K05592: ATP-dependent RNA helicase DeaD	0.00108876
K05593	K05593: aminoglycoside 6-adenylyltransferase	3.11246e-05
K05590	K05590: ATP-dependent RNA helicase SrmB	5.32237e-05
K05591	K05591: ATP-independent RNA helicase DbpA	7.68591e-05
K05596	K05596: LysR family transcriptional regulator, chromosome initiation	1.19121e-05
K05597	K05597: glutamin-(asparagin-)ase	4.38487e-06
K05594	K05594: ElaB protein	1.05909e-05
K05595	K05595: multiple antibiotic resistance protein	0.000399228
K01295	K01295: glutamate carboxypeptidase	3.44094e-06
K01297	K01297: muramoyltetrapeptide carboxypeptidase	0.000128785
K02921	K02921: large subunit ribosomal protein L37Ae	0.000125619
K02926	K02926: large subunit ribosomal protein L4	0.000815082
K02927	K02927: large subunit ribosomal protein L40e	3.15516e-05
K02924	K02924: large subunit ribosomal protein L39e	0.00116355
K14581	K14581	1.48269e-17
K00145	K00145: N-acetyl-gamma-glutamyl-phosphate reductase	0.000874525
K14540	K14540	0.000176555
K00216	K00216: 2,3-dihydro-2,3-dihydroxybenzoate dehydrogenase	2.60972e-05
K01569	K01569: oxalate decarboxylase	3.8854e-06
K00215	K00215: dihydrodipicolinate reductase	0.000937468
K00210	K00210: prephenate dehydrogenase	3.97512e-05
K01563	K01563: haloalkane dehalogenase	5.21582e-06
K01561	K01561: haloacetate dehalogenase	2.8609e-05
K01560	K01560: 2-haloacid dehalogenase	8.31459e-05
K01567	K01567	0.000185089
K00219	K00219: 2,4-dienoyl-CoA reductase (NADPH2)	0.000115157
K01035	K01035: acetate CoA-transferase beta subunit	0.000150638
K01034	K01034: acetate CoA-transferase alpha subunit	0.000139407
K04517	K04517: prephenate dehydrogenase	4.92713e-05
K04516	K04516: chorismate mutase	4.64648e-05
K01031	K01031: 3-oxoadipate CoA-transferase, alpha subunit	9.5309e-06
K01746	K01746: formiminotetrahydrofolate cyclodeaminase	0.000246503
K01745	K01745: histidine ammonia-lyase	0.000542609
K01032	K01032: 3-oxoadipate CoA-transferase, beta subunit	2.84082e-05
K02030	K02030: polar amino acid transport system substrate-binding protein	0.00116599
K02031	K02031: peptide/nickel transport system ATP-binding protein	0.00144971
K01749	K01749: hydroxymethylbilane synthase	0.00041509
K02033	K02033: peptide/nickel transport system permease protein	0.00117446
K01039	K01039: glutaconate CoA-transferase, subunit A	3.16267e-05
K04518	K04518: prephenate dehydratase	0.000115371
K02036	K02036: phosphate transport system ATP-binding protein	0.00125354
K02037	K02037: phosphate transport system permease protein	0.000916416
K01585	K01585: arginine decarboxylase	0.00011679
K01584	K01584: arginine decarboxylase	6.67403e-05
K01586	K01586: diaminopimelate decarboxylase	0.000810182
K13498	K13498	7.77096e-05
K01580	K01580: glutamate decarboxylase	5.74403e-05
K01582	K01582: lysine decarboxylase	0.000129603
K13497	K13497	1.49559e-05
K13490	K13490	1.2714e-05
K13491	K13491	7.14761e-05
K03548	K03548: putative permease	4.20419e-05
K02052	K02052: putative spermidine/putrescine transport system ATP-binding protein	0.000490946
K05557	K05557: MFS transporter, DHA2 family, integral membrane protein	5.60223e-06
K13656	K13656	4.8212e-05
K13657	K13657	4.72549e-05
K13654	K13654	2.07148e-05
K13652	K13652	1.29599e-05
K13653	K13653	0.000261957
K02051	K02051: sulfonate/nitrate/taurine transport system substrate-binding protein	0.000468923
K08344	K08344: suppressor for copper-sensitivity B	4.34904e-06
K08345	K08345: nitrate reductase 2, alpha subunit	4.20503e-06
K08346	K08346: nitrate reductase 2, beta subunit	5.1219e-06
K08347	K08347: nitrate reductase 2, gamma subunit	1.4693e-05
K08348	K08348: formate dehydrogenase-N, alpha subunit	6.04706e-05
K08349	K08349: formate dehydrogenase-N, beta subunit	1.26302e-06
K02456	K02456: general secretion pathway protein G	0.000504389
K02457	K02457: general secretion pathway protein H	6.02139e-06
K02106	K02106: short-chain fatty acids transporter	4.02634e-05
K02455	K02455: general secretion pathway protein F	0.000174787
K03459	K03459: formate transporter	1.51463e-05
K02453	K02453: general secretion pathway protein D	0.000106577
K02102	K02102: arabinose operon protein AraM	1.89305e-05
K02103	K02103: GntR family transcriptional regulator, arabinose operon	2.44478e-05
K03455	K03455: monovalent cation:H+ antiporter-2, CPA2 family	0.000322533
K03457	K03457: nucleobase:cation symporter-1, NCS1 family	5.50539e-05
K02055	K02055: putative spermidine/putrescine transport system substrate-binding	0.000108826
K02108	K02108: F-type H+-transporting ATPase subunit a	0.00035414
K02109	K02109: F-type H+-transporting ATPase subunit b	0.000256723
K03453	K03453: bile acid:Na+ symporter, BASS family	9.35372e-05
K05339	K05339: holin-like protein LrgB	9.76263e-05
K02193	K02193: heme exporter ATP-binding protein CcmA	9.04852e-05
K01639	K01639: N-acetylneuraminate lyase	7.44368e-05
K01638	K01638: malate synthase	2.14275e-05
K01637	K01637: isocitrate lyase	2.80927e-06
K01636	K01636	0.000279371
K01635	K01635: tagatose 1,6-diphosphate aldolase	4.41338e-06
K01633	K01633: dihydroneopterin aldolase	0.000240944
K02058	K02058: simple sugar transport system substrate-binding protein	0.000255533
K01631	K01631: 2-dehydro-3-deoxyphosphogalactonate aldolase	1.76089e-05
K01630	K01630: 2-dehydro-3-deoxyglucarate aldolase	7.1099e-06
K03851	K03851: taurine-pyruvate aminotransferase	3.52763e-06
K02190	K02190: sirohydrochlorin cobaltochelatase	0.000165591
K03855	K03855: ferredoxin like protein	0.000125619
K08485	K08485: phosphocarrier protein NPr	3.1432e-05
K03856	K03856: 3-deoxy-7-phosphoheptulonate synthase	0.000540246
K03379	K03379: cyclohexanone monooxygenase	6.12061e-12
K09148	K09148: hypothetical protein	1.46248e-05
K00158	K00158: pyruvate oxidase	6.57985e-05
K07718	K07718: two-component system, sensor histidine kinase YesM	0.00024105
K13018	K13018	0.000230366
K13019	K13019	0.000558656
K03523	K03523: putative biotin biosynthesis protein BioY	0.000340539
K03522	K03522: electron transfer flavoprotein alpha subunit	0.00143619
K03525	K03525: type III pantothenate kinase	0.000484746
K03524	K03524: BirA family transcriptional regulator, biotin operon repressor /	0.000519678
K03527	K03527: 4-hydroxy-3-methylbut-2-enyl diphosphate reductase	0.000331289
K03526	K03526: (E)-4-hydroxy-3-methylbut-2-enyl-diphosphate synthase	0.00118934
K13010	K13010	0.0002068
K00638	K00638: chloramphenicol O-acetyltransferase	8.35738e-05
K13012	K13012	0.000426595
K02851	K02851: undecaprenyl-phosphate alpha-N-acetylglucosaminyltransferase	3.27904e-05
K13014	K13014	3.4949e-05
K13015	K13015	0.000122707
K13016	K13016	0.000121396
K13017	K13017	0.000666111
K02495	K02495: oxygen-independent coproporphyrinogen III oxidase	0.000844635
K12431	K12431: polyketide synthase 2	1.47329e-06
K03671	K03671: thioredoxin 1	0.00327139
K03670	K03670: periplasmic glucans biosynthesis protein	1.43769e-05
K03672	K03672: thioredoxin 2	5.93442e-05
K02371	K02371: enoyl-[acyl carrier protein] reductase II	0.000424257
K03677	K03677: CysQ protein	4.62356e-05
K03676	K03676: glutaredoxin 3	2.06695e-05
K09761	K09761: ribosomal RNA small subunit methyltransferase E	0.000401539
K09760	K09760: DNA recombination protein RmuC	0.000392568
K09762	K09762: hypothetical protein	6.79641e-05
K09765	K09765: hypothetical protein	0.000223247
K09764	K09764: hypothetical protein	3.20801e-05
K09767	K09767: hypothetical protein	4.59377e-05
K02217	K02217: ferritin 1	0.000500055
K09769	K09769: hypothetical protein	0.00050083
K09768	K09768: hypothetical protein	0.000249343
K05847	K05847: osmoprotectant transport system ATP-binding protein	0.000323801
K13274	K13274	2.12131e-05
K13275	K13275	0.000209949
K13276	K13276	9.03477e-06
K13277	K13277	6.99964e-06
K03076	K03076: preprotein translocase subunit SecY	0.000955815
K00631	K00631: glycerol-3-phosphate O-acyltransferase	3.39971e-05
K03299	K03299: gluconate:H+ symporter, GntP family	8.71804e-05
K03298	K03298: drug/metabolite transporter, DME family	4.98905e-06
K03293	K03293: amino acid transporter, AAT family	0.000152873
K03292	K03292: glycoside/pentoside/hexuronide:cation symporter, GPH family	0.000173989
K03291	K03291: MFS transporter, SET family, sugar efflux transporter	1.89298e-05
K03297	K03297: small multidrug resistance protein, SMR family	4.07119e-05
K03296	K03296: hydrophobic/amphiphilic exporter-1 (mainly G- bacteria), HAE1 family	0.00136382
K03295	K03295: cation efflux system protein, CDF family	0.000113692
K13479	K13479	0.000204246
K03073	K03073: preprotein translocase subunit SecE	4.78162e-05
K03072	K03072: preprotein translocase subunit SecD	0.000519294
K03071	K03071: preprotein translocase subunit SecB	1.92323e-05
K03070	K03070: preprotein translocase subunit SecA	0.00102812
K03077	K03077: L-ribulose-5-phosphate 4-epimerase	0.000142289
K08969	K08969: aminotransferase	0.000263782
K03075	K03075: preprotein translocase subunit SecG	7.31175e-05
K03074	K03074: preprotein translocase subunit SecF	0.00034837
K08964	K08964: methylthioribulose-1-phosphate dehydratase	6.4393e-05
K08965	K08965: 2,3-diketo-5-methylthiopentyl-1-phosphate enolase	7.2502e-05
K03079	K03079: L-ribulose-5-phosphate 3-epimerase	2.21887e-05
K08967	K08967: 1,2-dihydroxy-3-keto-5-methylthiopentene dioxygenase [EC:1.13.11.53	8.28738e-06
K08961	K08961: chondroitin-sulfate-ABC endolyase	4.31549e-06
K08963	K08963: methylthioribose-1-phosphate isomerase	0.00100652
K03274	K03274: ADP-L-glycero-D-manno-heptose 6-epimerase	0.000167647
K03277	K03277: heptosyltransferase IV	2.64015e-07
K03271	K03271: phosphoheptose isomerase	0.000751602
K03270	K03270: 3-deoxy-D-manno-octulosonate 8-phosphate phosphatase (KDO 8-P	0.000528533
K03273	K03273: D-glycero-D-manno-heptose 1,7-bisphosphate phosphatase	0.000426586
K03272	K03272: D-beta-D-heptose 7-phosphate kinase	0.000427011
K10965	K10965: toxin co-regulated pilus biosynthesis protein T	1.02504e-07
K11637	K11637: two-component system, CitB family, sensor histidine kinase CitS	1.08604e-05
K03279	K03279: UDP-glucose:(glucosyl/galactosyl)LPS alpha-1,2-glucosyltransferase	8.82675e-06
K06139	K06139: pyrroloquinoline quinone biosynthesis protein E	0.000152489
K06137	K06137: pyrroloquinoline-quinone synthase	1.21057e-05
K10966	K10966: toxin co-regulated pilus biosynthesis protein J [EC:3.4.23.43	3.39547e-06
K06131	K06131: cardiolipin synthase	0.000825754
K09749	K09749: hypothetical protein	2.68296e-06
K06133	K06133: 4'-phosphopantetheinyl transferase	1.392e-05
K06132	K06132: putative cardiolipin synthase	7.87834e-06
K03187	K03187: urease accessory protein	2.11745e-05
K03186	K03186: 3-octaprenyl-4-hydroxybenzoate carboxy-lyase UbiX	0.000455418
K03185	K03185: 2-octaprenyl-6-methoxyphenol hydroxylase	1.06937e-05
K03184	K03184: 2-octaprenyl-3-methyl-6-methoxy-1,4-benzoquinol hydroxylase	2.33389e-05
K03183	K03183: ubiquinone/menaquinone biosynthesis methyltransferase	0.000950681
K03182	K03182: 3-octaprenyl-4-hydroxybenzoate carboxy-lyase UbiD	0.0001022
K03181	K03181: chorismate--pyruvate lyase	4.31812e-07
K10005	K10005: glutamate transport system substrate-binding protein	5.52689e-06
K00949	K00949: thiamine pyrophosphokinase	8.06444e-05
K03189	K03189: urease accessory protein	6.33888e-05
K12278	K12278: MSHA biogenesis protein MshG	4.50184e-05
K11634	K11634: two-component system, OmpR family, response regulator YxdJ	4.55576e-05
K06023	K06023: HPr kinase/phosphorylase	0.000352678
K07552	K07552: MFS transporter, DHA1 family, bicyclomycin/chloramphenicol	0.000161321
K12453	K12453: CDP-paratose synthetase	1.04682e-05
K12452	K12452: CDP-6-deoxy-D-xylo-4-hexulose-3-dehydrase	0.000169676
K07192	K07192: flotillin	0.000113984
K09970	K09970: general L-amino acid transport system permease protein	1.34187e-05
K07358	K07358: type 1 fimbriae regulatory protein FimE	7.53398e-06
K07740	K07740: regulator of sigma D	1.49799e-05
K07357	K07357: type 1 fimbriae regulatory protein FimB	5.45934e-06
K07354	K07354: outer membrane usher protein	3.97073e-06
K07353	K07353: fimbrial chaperone protein	6.48576e-06
K07350	K07350: minor fimbrial subunit	9.94485e-06
K09746	K09746: hypothetical protein	8.67007e-05
K09909	K09909: hypothetical protein	6.68003e-06
K00986	K00986: RNA-directed DNA polymerase	4.61835e-06
K06221	K06221: 2,5-diketo-D-gluconate reductase A	0.000358033
K09903	K09903: uridylate kinase	0.00103736
K06222	K06222: 2,5-diketo-D-gluconate reductase B	3.73391e-05
K09904	K09904: hypothetical protein	1.6544e-05
K01889	K01889: phenylalanyl-tRNA synthetase alpha chain	0.00103338
K06919	K06919	3.71208e-05
K06918	K06918	3.17388e-06
K06917	K06917: tRNA 2-selenouridine synthase	9.04631e-06
K06916	K06916	1.02094e-05
K06915	K06915	0.000363535
K06911	K06911	0.000849864
K00983	K00983: N-acylneuraminate cytidylyltransferase	4.87908e-05
K00773	K00773: queuine tRNA-ribosyltransferase	0.00109875
K00772	K00772: 5'-methylthioadenosine phosphorylase	0.000463527
K01299	K01299: carboxypeptidase Taq	8.60553e-05
K08984	K08984: putative membrane protein	7.13744e-06
K08981	K08981: putative membrane protein	2.01958e-05
K07518	K07518: hydroxybutyrate-dimer hydrolase	2.05756e-06
K10439	K10439: ribose transport system substrate-binding protein	0.000213192
K08167	K08167: MFS transporter, DHA2 family, methyl viologen resistance protein	7.67995e-05
K06351	K06351: inhibitor of KinA	4.8345e-05
K06350	K06350: antagonist of KipI	2.86812e-05
K10925	K10925: MSHA pilin protein MshB	8.51919e-06
K10924	K10924: MSHA pilin protein MshA	5.63065e-06
K10927	K10927: MSHA pilin protein MshD	4.25399e-07
K06359	K06359: response regulator aspartate phosphatase A (stage 0 sporulation	1.97318e-05
K07516	K07516	1.8098e-05
K10213	K10213: ribosylpyrimidine nucleosidase	0.000132693
K10212	K10212: glycosyl-4,4'-diaponeurosporenoate acyltransferase	1.82702e-05
K10747	K10747: DNA ligase 1	8.24304e-05
K10210	K10210: 4,4'-diaponeurosporene oxidase	7.84284e-06
K10215	K10215: monooxygenase	6.09731e-06
K10218	K10218: 4-hydroxy-4-methyl-2-oxoglutarate aldolase	0.000141373
K10748	K10748: DNA replication terminus site-binding protein	2.42596e-12
K13795	K13795	3.7861e-06
K01912	K01912: phenylacetate-CoA ligase	0.00144985
K01913	K01913	0.000104374
K01910	K01910: [citrate (pro-3S)-lyase] ligase	3.94998e-05
K01911	K01911: O-succinylbenzoic acid--CoA ligase	7.63078e-05
K01916	K01916: NAD+ synthase	0.000326395
K01917	K01917: glutathionylspermidine synthase	1.17905e-14
K01914	K01914: aspartate--ammonia ligase	0.00054878
K01915	K01915: glutamine synthetase	0.000685513
K01918	K01918: pantoate--beta-alanine ligase	0.000404316
K01919	K01919: glutamate--cysteine ligase	2.60629e-05
K07774	K07774: two-component system, OmpR family, response regulator TctD	8.05377e-05
K07775	K07775: two-component system, OmpR family, response regulator ResD	0.000377131
K00179	K00179: indolepyruvate ferredoxin oxidoreductase, alpha subunit	1.21278e-05
K07777	K07777: two-component system, NarL family, sensor histidine kinase DegS	2.28323e-05
K05934	K05934: precorrin-3B C17-methyltransferase	0.000466465
K07771	K07771: two-component system, OmpR family, response regulator BasR	2.09716e-05
K05936	K05936: precorrin-4 C11-methyltransferase	0.000696018
K05937	K05937: hypothetical protein	1.21479e-05
K00172	K00172: pyruvate ferredoxin oxidoreductase, gamma subunit	5.28053e-05
K00171	K00171: pyruvate ferredoxin oxidoreductase, delta subunit	0.000200526
K00170	K00170: pyruvate ferredoxin oxidoreductase, beta subunit	0.000194783
K00177	K00177: 2-oxoglutarate ferredoxin oxidoreductase subunit gamma	0.000821716
K00176	K00176: 2-oxoglutarate ferredoxin oxidoreductase subunit delta	0.000199837
K00175	K00175: 2-oxoglutarate ferredoxin oxidoreductase subunit beta	0.00173251
K00174	K00174: 2-oxoglutarate ferredoxin oxidoreductase subunit alpha	0.00140928
K07177	K07177: PDZ domain-containing protein	5.13256e-05
K07175	K07175: PhoH-like ATPase	0.000202503
K07172	K07172	5.2942e-05
K07173	K07173: S-ribosylhomocysteine lyase	4.71799e-05
K07170	K07170: GAF domain-containing protein	0.000430437
K07171	K07171	0.000720045
K00375	K00375: GntR family transcriptional regulator / MocR family aminotransferase	0.000125529
K00374	K00374: nitrate reductase 1, gamma subunit	1.82841e-05
K00376	K00376: nitrous-oxide reductase	1.40366e-05
K00371	K00371: nitrate reductase 1, beta subunit	5.93384e-05
K00370	K00370: nitrate reductase 1, alpha subunit	4.96622e-05
K07178	K07178: RIO kinase 1	0.000279599
K07179	K07179: RIO kinase 2	8.78713e-05
K09167	K09167: hypothetical protein	0.000169399
K09165	K09165: hypothetical protein	0.000395277
K09162	K09162: hypothetical protein	3.0473e-06
K09161	K09161: hypothetical protein	1.67154e-07
K09160	K09160: hypothetical protein	2.05643e-05
K03809	K03809: Trp repressor binding protein	0.000353679
K01354	K01354: oligopeptidase B	0.000167991
K00198	K00198: carbon-monoxide dehydrogenase catalytic subunit	7.12098e-05
K01356	K01356: repressor LexA	0.000786776
K05601	K05601: hydroxylamine reductase	0.000130573
K14338	K14338	4.05188e-07
K10109	K10109: maltose/maltodextrin transport system permease protein	0.000141851
K10108	K10108: maltose/maltodextrin transport system substrate-binding protein	3.94476e-05
K10107	K10107: capsular polysaccharide transport system permease protein	1.92729e-05
K14335	K14335	2.70896e-05
K14333	K14333	4.66165e-06
K01828	K01828	0.000295172
K01826	K01826: 5-carboxymethyl-2-hydroxymuconate isomerase	6.34671e-06
K02547	K02547: methicillin resistance protein	1.00481e-06
K01825	K01825: dodecenoyl-CoA delta-isomerase	7.48939e-06
K01823	K01823: isopentenyl-diphosphate delta-isomerase	0.000351051
K01820	K01820	2.31874e-05
K01821	K01821: 4-oxalocrotonate tautomerase	0.000194459
K00518	K00518: superoxide dismutase	4.37208e-05
K04078	K04078: chaperonin GroES	0.000875358
K04079	K04079: molecular chaperone HtpG	0.000429891
K04076	K04076: Lon-like ATP-dependent protease	0.000384014
K04077	K04077: chaperonin GroEL	0.00114357
K04074	K04074: cell division initiation protein	1.44516e-05
K04075	K04075: cell cycle protein MesJ	0.000398152
K04072	K04072: acetaldehyde dehydrogenase	0.000333989
K04073	K04073: acetaldehyde dehydrogenase	2.91743e-05
K04070	K04070: putative pyruvate formate lyase activating enzyme	0.000280971
K04071	K04071: 6-pyruvoyltetrahydropterin 2'-reductase	1.76347e-05
K00466	K00466: tryptophan 2-monooxygenase	3.2229e-05
K02929	K02929: large subunit ribosomal protein L44e	1.604e-05
K00998	K00998: phosphatidylserine synthase	0.000311496
K04691	K04691: serine protease DegS	0.000161209
K00995	K00995: CDP-diacylglycerol--glycerol-3-phosphate 3-phosphatidyltransferase	0.0011627
K00997	K00997: holo-[acyl-carrier protein] synthase	0.000439883
K00996	K00996: undecaprenyl-phosphate galactose phosphotransferase	0.000106972
K00991	K00991: 2-C-methyl-D-erythritol 4-phosphate cytidylyltransferase	0.000580075
K00990	K00990: [protein-PII] uridylyltransferase	3.86616e-05
K11103	K11103: aerobic C4-dicarboxylate transport protein	4.66807e-05
K00992	K00992	7.35413e-05
K05589	K05589: cell division protein FtsB	1.39414e-05
K12508	K12508: feruloyl-CoA synthase	2.39058e-06
K02931	K02931: large subunit ribosomal protein L5	0.00139154
K02930	K02930: large subunit ribosomal protein L4e	0.00023618
K02933	K02933: large subunit ribosomal protein L6	0.000908594
K02935	K02935: large subunit ribosomal protein L7/L12	0.0012233
K02936	K02936: large subunit ribosomal protein L7Ae	0.000112703
K02939	K02939: large subunit ribosomal protein L9	0.000577024
K14201	K14201	6.2717e-07
K03153	K03153: glycine oxidase	2.741e-05
K14205	K14205	2.93613e-05
K02363	K02363: enterobactin 2,3-dihydroxybenzoate-AMP ligase /	7.9058e-07
K00207	K00207: dihydropyrimidine dehydrogenase (NADP+)	3.26041e-05
K00208	K00208: enoyl-[acyl-carrier protein] reductase I	0.000236402
K01000	K01000: phospho-N-acetylmuramoyl-pentapeptide-transferase	0.000750189
K14591	K14591	6.6299e-06
K01002	K01002: phosphoglycerol transferase	8.31054e-06
K01003	K01003: carboxyvinyl-carboxyphosphonate phosphorylmutase	3.17626e-05
K01006	K01006: pyruvate,orthophosphate dikinase	0.000932242
K01007	K01007: pyruvate, water dikinase	0.000574899
K01008	K01008: selenide, water dikinase	0.000592934
K09779	K09779: hypothetical protein	0.000181576
K13488	K13488	1.74471e-05
K12503	K12503: short-chain Z-isoprenyl diphosphate synthetase	2.00531e-05
K13820	K13820	3.34057e-05
K13483	K13483	0.000173831
K13482	K13482	0.000146667
K13481	K13481	0.000156338
K13480	K13480	0.000198503
K13487	K13487	2.61397e-05
K13486	K13486	3.94128e-06
K02116	K02116: ATP synthase protein I	2.28889e-05
K14447	K14447	4.42546e-06
K08195	K08195: MFS transporter, AAHS family, 4-hydroxybenzoate transporter	3.98249e-05
K08194	K08194: MFS transporter, ACS family, D-galactonate transporter	8.61874e-06
K10795	K10795: D-proline reductase (dithiol) PrdD	7.46585e-25
K13641	K13641	4.70665e-05
K13640	K13640	0.000144086
K13643	K13643	8.54511e-05
K01130	K01130: arylsulfatase	0.000202603
K08359	K08359: tetrathionate reductase subunit C	4.1322e-06
K08358	K08358: tetrathionate reductase subunit B	0.000135793
K08357	K08357: tetrathionate reductase subunit A	5.26457e-06
K06113	K06113: arabinan endo-1,5-alpha-L-arabinosidase	0.000171372
K01564	K01564	3.64725e-06
K01138	K01138	0.000129126
K01139	K01139: guanosine-3',5'-bis(diphosphate) 3'-pyrophosphohydrolase	0.000243493
K08351	K08351: biotin sulfoxide reductase	3.1007e-05
K02113	K02113: F-type H+-transporting ATPase subunit delta	0.000123946
K02444	K02444: DeoR family transcriptional regulator, glycerol-3-phosphate regulon	0.000198352
K02111	K02111: F-type H+-transporting ATPase subunit alpha	0.000764845
K02446	K02446: fructose-1,6-bisphosphatase II	0.000157403
K02441	K02441: GlpG protein	2.68655e-05
K02440	K02440: glycerol uptake facilitator protein	0.00017069
K02443	K02443: glycerol uptake operon antiterminator	0.000102695
K02114	K02114: F-type H+-transporting ATPase subunit epsilon	6.76733e-05
K02119	K02119: V-type H+-transporting ATPase subunit C	6.18574e-05
K02118	K02118: V-type H+-transporting ATPase subunit B	0.0010688
K02448	K02448: nitric-oxide reductase NorD protein	2.43746e-06
K03466	K03466: DNA segregation ATPase FtsK/SpoIIIE, S-DNA-T family	0.000644559
K01649	K01649: 2-isopropylmalate synthase	0.0018514
K01643	K01643: citrate lyase subunit alpha	0.000176765
K01640	K01640: hydroxymethylglutaryl-CoA lyase	6.75887e-05
K01641	K01641: hydroxymethylglutaryl-CoA synthase	3.85327e-06
K01646	K01646: citrate lyase subunit gamma	0.000114032
K01647	K01647: citrate synthase	0.00029209
K01644	K01644: citrate lyase subunit beta	0.000212852
K13007	K13007	4.51868e-05
K06953	K06953	1.20787e-05
K13004	K13004	2.86091e-05
K13002	K13002	8.88901e-05
K13001	K13001	3.29423e-05
K01744	K01744: aspartate ammonia-lyase	0.000257171
K02598	K02598: nitrite transporter NirC	0.000144102
K14060	K14060	7.61086e-06
K02848	K02848: lipopolysaccharide core biosynthesis protein RFAP	5.56614e-06
K02025	K02025: multiple sugar transport system permease protein	0.00173821
K02024	K02024: maltoporin	1.85167e-05
K02023	K02023: multiple sugar transport system ATP-binding protein	0.00025374
K02022	K02022	4.85654e-05
K02021	K02021: putative ABC transport system ATP-binding protein	0.000107518
K02020	K02020: molybdate transport system substrate-binding protein	0.00034025
K02841	K02841: heptosyltransferase I	0.000100606
K02840	K02840: UDP-D-galactose:(glucosyl)LPS alpha-1,6-D-galactosyltransferase	8.31046e-06
K02843	K02843: heptosyltransferase II	0.000154874
K03517	K03517: quinolinate synthase	0.00058933
K02844	K02844: UDP-glucose:(heptosyl)LPS alpha-1,3-glucosyltransferase	7.37609e-05
K02029	K02029: polar amino acid transport system permease protein	0.00121838
K02846	K02846: N-methyl-L-tryptophan oxidase	6.08669e-05
K03885	K03885: NADH dehydrogenase	6.86079e-05
K02034	K02034: peptide/nickel transport system permease protein	0.00116662
K11811	K11811: arsenical resistance protein ArsH	6.31675e-06
K02035	K02035: peptide/nickel transport system substrate-binding protein	0.000640934
K07132	K07132	3.38083e-05
K09758	K09758: aspartate 4-decarboxylase	4.37221e-05
K09759	K09759: nondiscriminating aspartyl-tRNA synthetase	0.000122235
K07313	K07313: serine/threonine protein phosphatase 1	6.00656e-05
K02205	K02205: arginine/ornithine permease	1.10711e-05
K02204	K02204: homoserine kinase type II	4.72053e-06
K02203	K02203: phosphoserine / homoserine phosphotransferase	3.63835e-05
K07130	K07130	0.000254767
K02201	K02201: pantetheine-phosphate adenylyltransferase	3.13606e-05
K02200	K02200: cytochrome c-type biogenesis protein CcmH	1.15566e-05
K07136	K07136	1.13872e-05
K01428	K01428: urease alpha subunit	0.000120289
K07137	K07137	0.000467107
K11939	K11939: inner membrane transporter RhtA	2.02268e-05
K01429	K01429: urease beta subunit	1.58596e-05
K12993	K12993	1.79549e-05
K12990	K12990	9.17983e-06
K12997	K12997	1.59037e-05
K12994	K12994	0.000104654
K12995	K12995	1.17459e-05
K08979	K08979: putative membrane protein	4.78116e-05
K08978	K08978: putative membrane protein	9.98835e-05
K03088	K03088: RNA polymerase sigma-70 factor, ECF subfamily	0.00165607
K03089	K03089: RNA polymerase sigma-32 factor	4.87262e-05
K03086	K03086: RNA polymerase primary sigma factor	0.000868233
K03087	K03087: RNA polymerase nonessential primary-like sigma factor	9.44735e-05
K08971	K08971: putative membrane protein	5.76574e-05
K08970	K08970: nickel/cobalt exporter	3.96698e-06
K03082	K03082: hexulose-6-phosphate isomerase	6.10323e-05
K03080	K03080: L-ribulose-5-phosphate 4-epimerase	5.53297e-05
K03081	K03081: 3-dehydro-L-gulonate-6-phosphate decarboxylase	3.42508e-07
K03242	K03242: translation initiation factor eIF-2 gamma subunit	0.000292046
K03243	K03243: translation initiation factor IF-2 unclassified subunit	0.000212329
K02835	K02835: peptide chain release factor RF-1	0.00130129
K03474	K03474: pyridoxine 5-phosphate synthase	0.000268451
K01589	K01589: phosphoribosylaminoimidazole carboxylase ATPase subunit	4.50584e-05
K01588	K01588: phosphoribosylaminoimidazole carboxylase catalytic subunit	0.00153129
K03644	K03644: lipoic acid synthetase	0.000506418
K03645	K03645: negative modulator of initiation of replication	1.0549e-19
K03646	K03646: colicin import membrane protein	2.80258e-05
K03647	K03647: protein involved in ribonucleotide reduction	4.47984e-05
K03640	K03640: peptidoglycan-associated lipoprotein	0.000193307
K03641	K03641: TolB protein	0.000322435
K03642	K03642: rare lipoprotein A	0.00015987
K03643	K03643: LPS-assembly lipoprotein	7.66357e-06
K03648	K03648: uracil-DNA glycosylase	0.000287928
K03649	K03649: TDG/mug DNA glycosylase family protein	3.72931e-05
K07659	K07659: two-component system, OmpR family, phosphate regulon response	0.000152044
K12428	K12428: fatty acid CoA ligase FadD32	2.35131e-06
K12429	K12429: fatty acid CoA ligase FadD36	1.51402e-05
K12422	K12422: long chain fatty acid CoA ligase FadD10	3.54739e-06
K12423	K12423: fatty acid CoA ligase FadD21	4.85354e-06
K12420	K12420: ketoacyl reductase	1.38306e-05
K12421	K12421: fatty acid CoA ligase FadD9	4.23274e-06
K12426	K12426: long chain fatty acid CoA FadD26	7.47247e-06
K12427	K12427: fatty acid CoA ligase FadD28	1.11716e-06
K12424	K12424: fatty acid CoA ligase FadD22	7.20466e-06
K07184	K07184: SH3 domain protein	1.47696e-05
K06214	K06214: curli production assembly/transport component CsgG	5.38529e-06
K09935	K09935: hypothetical protein	1.62144e-05
K09936	K09936: hypothetical protein	0.000163624
K06217	K06217: phosphate starvation-inducible protein PhoH and related proteins	0.000416499
K07349	K07349: minor fimbrial subunit	1.11616e-22
K06211	K06211: HipB family transcriptional regulator, involved in the regulation of	1.07508e-05
K06212	K06212: formate transporter	0.000264566
K06213	K06213: magnesium transporter	0.000571049
K07345	K07345: major type 1 subunit fimbrin (pilin)	1.63926e-05
K07344	K07344: type IV secretion system protein TrbL	1.95358e-05
K07347	K07347: outer membrane usher protein	3.30727e-05
K07346	K07346: fimbrial chaperone protein	1.83809e-05
K07341	K07341: death on curing protein	6.32087e-05
K06219	K06219: S-adenosylmethionine-dependent methyltransferase	3.40475e-06
K07343	K07343: DNA transformation protein and related proteins	8.88518e-05
K07342	K07342: protein transport protein SEC61 subunit gamma and related proteins	5.23411e-05
K11646	K11646: dehydroquinate synthase II	0.000262111
K11641	K11641: two-component system, LytT family, response regulator NatR	6.35854e-06
K11640	K11640: two-component system, LytT family, sensor histidine kinase NatK	2.04307e-09
K07744	K07744: hypothetical protein	0.000101315
K06968	K06968	1.97054e-06
K06969	K06969: putative SAM-dependent methyltransferase	0.000424528
K06962	K06962	1.73956e-05
K06960	K06960	0.000709748
K06961	K06961	3.2606e-05
K06966	K06966	0.000627362
K06967	K06967	9.80196e-05
K06965	K06965	9.59532e-05
K00748	K00748: lipid-A-disaccharide synthase	0.000161126
K00745	K00745: raffinose-raffinose alpha-galactotransferase	5.84658e-05
K01868	K01868: threonyl-tRNA synthetase	0.000973575
K07507	K07507: putative Mg2+ transporter-C (MgtC) family protein	0.000416652
K07506	K07506: AraC family transcriptional regulator	8.6577e-06
K08997	K08997: hypothetical protein	3.06309e-06
K07504	K07504: hypothetical protein	1.26061e-05
K07503	K07503: hypothetical protein	3.71341e-05
K07502	K07502: hypothetical protein	4.33433e-05
K07501	K07501: hypothetical protein	1.13009e-05
K08992	K08992: putative membrane protein	2.92472e-05
K08999	K08999: hypothetical protein	0.000183273
K08998	K08998: hypothetical protein	0.000972275
K09800	K09800: hypothetical protein	4.52676e-06
K09803	K09803: hypothetical protein	7.85117e-05
K03154	K03154: thiamine biosynthesis ThiS	0.00023096
K09805	K09805: hypothetical protein	3.76505e-05
K09807	K09807: hypothetical protein	3.03216e-05
K09808	K09808: lipoprotein-releasing system permease protein	0.000202845
K09809	K09809: CDP-glycerol glycerophosphotransferase	5.99889e-06
K10912	K10912: two-component system, repressor protein LuxO	5.13002e-05
K10914	K10914: CRP/FNR family transcriptional regulator, cyclic AMP receptor	1.41914e-05
K10916	K10916: two-component system, CAI-1 autoinducer sensor kinase/phosphatase	4.17965e-06
K10917	K10917: PadR family transcriptional regulator, regulatory protein AphA	3.33346e-05
K00939	K00939: adenylate kinase	0.00131371
K10773	K10773: endonuclease III	0.000961866
K10775	K10775: phenylalanine ammonia-lyase	7.20032e-06
K10778	K10778: AraC family transcriptional regulator, regulatory protein of	7.04669e-05
K11638	K11638: two-component system, CitB family, response regulator CitT	8.39118e-06
K11358	K11358: aspartate aminotransferase	0.000231396
K01903	K01903: succinyl-CoA synthetase beta subunit	0.000456593
K01902	K01902: succinyl-CoA synthetase alpha subunit	0.000560919
K01905	K01905: acetyl-CoA synthetase (ADP-forming)	0.000109093
K01907	K01907: acetoacetyl-CoA synthetase	2.14118e-05
K01909	K01909: long-chain-fatty-acid--[acyl-carrier-protein] ligase	6.09323e-07
K01908	K01908: propionyl-CoA synthetase	5.1251e-05
K13819	K13819	6.3798e-05
K00147	K00147: glutamate-5-semialdehyde dehydrogenase	0.00085904
K09690	K09690: lipopolysaccharide transport system permease protein	2.24744e-05
K05927	K05927: quinone-reactive Ni/Fe-hydrogenase small subunit	7.09515e-05
K07768	K07768: two-component system, OmpR family, sensor histidine kinase SenX3	3.7127e-05
K08082	K08082: two-component system, LytT family, sensor histidine kinase AlgZ	4.98855e-05
K05922	K05922: quinone-reactive Ni/Fe-hydrogenase large subunit	0.000208423
K05921	K05921: 5-oxopent-3-ene-1,2,5-tricarboxylate decarboxylase /	0.000157134
K00348	K00348: Na+-transporting NADH:ubiquinone oxidoreductase subunit C	5.24716e-11
K00349	K00349: Na+-transporting NADH:ubiquinone oxidoreductase subunit D	0.000282078
K07166	K07166: ACT domain-containing protein	0.000464981
K07161	K07161	1.2431e-05
K07160	K07160	6.50131e-05
K00340	K00340: NADH dehydrogenase I subunit K	0.000821649
K00341	K00341: NADH dehydrogenase I subunit L	0.000590013
K00690	K00690: sucrose phosphorylase	2.44229e-05
K00343	K00343: NADH dehydrogenase I subunit N	0.000289368
K00344	K00344: NADPH2:quinone reductase	9.66837e-05
K00697	K00697: alpha,alpha-trehalose-phosphate synthase (UDP-forming)	0.000168869
K00346	K00346: Na+-transporting NADH:ubiquinone oxidoreductase subunit A	1.45029e-05
K00347	K00347: Na+-transporting NADH:ubiquinone oxidoreductase subunit B	0.000198239
K09714	K09714: hypothetical protein	4.65156e-05
K09117	K09117: hypothetical protein	0.000263732
K05337	K05337: ferredoxin	0.000330165
K09118	K09118: hypothetical protein	3.80488e-05
K02454	K02454: general secretion pathway protein E	0.000631846
K05822	K05822: tetrahydrodipicolinate N-acetyltransferase	7.93139e-05
K05823	K05823: N-acetyldiaminopimelate deacetylase	0.000210556
K05820	K05820: MFS transporter, PPP family, 3-phenylpropionic acid transporter	3.90335e-06
K12430	K12430: polyketide synthase 1/15	1.92416e-06
K02452	K02452: general secretion pathway protein C	1.14336e-05
K00936	K00936	0.000930009
K02101	K02101: arabinose operon protein AraL	2.26426e-05
K00525	K00525: ribonucleoside-diphosphate reductase alpha chain	0.000628145
K00526	K00526: ribonucleoside-diphosphate reductase beta chain	0.000163301
K00527	K00527: ribonucleoside-triphosphate reductase	0.000615019
K00520	K00520: mercuric reductase	8.64545e-05
K02450	K02450: general secretion pathway protein A	8.86905e-05
K01835	K01835: phosphoglucomutase	0.000638355
K01834	K01834: phosphoglycerate mutase	0.00134351
K03593	K03593: ATP-binding protein involved in chromosome partitioning	0.00148581
K00528	K00528: ferredoxin--NADP+ reductase	0.000810032
K00529	K00529: ferredoxin--NAD+ reductase	5.12902e-05
K04069	K04069: pyruvate formate lyase activating enzyme	0.000810573
K04068	K04068: anaerobic ribonucleoside-triphosphate reductase activating protein	9.61599e-05
K04065	K04065: hyperosmotically inducible periplasmic protein	0.000117934
K07042	K07042	0.000208961
K04067	K04067: primosomal replication protein N"	7.55519e-08
K04066	K04066: primosomal protein N' (replication factor Y) (superfamily II	0.000595876
K04061	K04061: flagellar biosynthesis protein	0.000121995
K04060	K04060: type III secretion protein SctY	2.73711e-05
K04063	K04063: osmotically inducible protein OsmC	9.32367e-05
K07043	K07043	0.000600951
K06203	K06203: CysZ protein	2.3331e-08
K07040	K07040	8.62595e-06
K09922	K09922: hypothetical protein	0.000283141
K03451	K03451: betaine/carnitine transporter, BCCT family	1.14185e-05
K07041	K07041	0.000264603
K06201	K06201: copper homeostasis protein	0.000391261
K10006	K10006: glutamate transport system permease protein	6.85546e-06
K10007	K10007: glutamate transport system permease protein	4.98572e-06
K14215	K14215	2.53675e-05
K09920	K09920: hypothetical protein	2.04691e-05
K10002	K10002: glutamate/aspartate transport system permease protein	7.56673e-06
K05338	K05338: holin-like protein	0.000246833
K10000	K10000: arginine transport system ATP-binding protein	4.86175e-05
K10001	K10001: glutamate/aspartate transport system substrate-binding protein	2.45028e-05
K12254	K12254: 4-guanidinobutyraldehyde dehydrogenase / NAD-dependent aldehyde	1.092e-06
K09927	K09927: hypothetical protein	3.63835e-06
K09024	K09024: putative flavin reductase RutF	8.96268e-06
K02459	K02459: general secretion pathway protein J	0.000108966
K09022	K09022: UPF0076 protein YjgF	9.55177e-05
K00027	K00027: malate dehydrogenase (oxaloacetate-decarboxylating)	0.000685521
K09020	K09020: putative isochorismatase family protein RutB	6.48576e-06
K09021	K09021: UPF0076 protein RutC	9.67962e-06
K00762	K00762: orotate phosphoribosyltransferase	0.00113046
K02909	K02909: large subunit ribosomal protein L31	0.00108495
K08218	K08218: MFS transporter, PAT family, beta-lactamase induction signal	2.55712e-05
K08219	K08219: MFS transporter, UMF2 family, putative MFS family transporter	3.90504e-06
K02904	K02904: large subunit ribosomal protein L29	0.000158176
K08217	K08217: MFS transporter, DHA3 family, macrolide efflux protein	6.79216e-06
K02906	K02906: large subunit ribosomal protein L3	0.00125409
K02907	K02907: large subunit ribosomal protein L30	0.000665224
K02902	K02902: large subunit ribosomal protein L28	0.00125742
K07722	K07722: CopG family transcriptional regulator, nickel-responsive regulator	0.000435646
K00230	K00230: protoporphyrinogen oxidase	1.74458e-05
K00231	K00231: protoporphyrinogen oxidase	3.80238e-05
K00625	K00625: phosphate acetyltransferase	0.000756385
K01342	K01342: subtilisin	8.90468e-05
K00239	K00239: succinate dehydrogenase flavoprotein subunit	0.000458052
K07049	K07049	0.000106172
K01707	K01707: 5-dehydro-4-deoxyglucarate dehydratase	1.53798e-11
K09928	K09928: hypothetical protein	1.69514e-05
K14588	K14588	8.4526e-06
K01012	K01012: biotin synthetase	0.000536879
K01011	K01011: 3-mercaptopyruvate sulfurtransferase	0.000107545
K00836	K00836: diaminobutyrate-2-oxoglutarate transaminase	9.49414e-05
K00837	K00837	0.000347024
K00835	K00835: valine--pyruvate aminotransferase	4.57777e-05
K00832	K00832: aromatic-amino-acid transaminase	1.12226e-05
K00833	K00833: adenosylmethionine-8-amino-7-oxononanoate aminotransferase	0.000105847
K00830	K00830: serine--pyruvate aminotransferase	2.46097e-05
K00831	K00831: phosphoserine aminotransferase	0.000612086
K00839	K00839: aminotransferase	0.000187668
K13678	K13678	8.78796e-06
K13670	K13670	4.61635e-05
K03521	K03521: electron transfer flavoprotein beta subunit	0.00109258
K04334	K04334: major curlin subunit	9.87897e-06
K01120	K01120: 3',5'-cyclic-nucleotide phosphodiesterase	1.35119e-05
K01126	K01126: glycerophosphoryl diester phosphodiesterase	0.000452889
K04333	K04333: LuxR family transcriptional regulator, csgAB operon transcriptional	3.67378e-05
K08322	K08322: starvation sensing protein RspB	1.75269e-05
K08323	K08323: starvation sensing protein RspA	4.64102e-05
K01129	K01129: dGTPase	0.000593292
K08321	K08321: putative autoinducer-2 (AI-2) aldolase	0.000225488
K08326	K08326: aminopeptidase	2.85541e-05
K08324	K08324: aldehyde dehydrogenase family protein	6.47239e-06
K08325	K08325: NADP-dependent alcohol dehydrogenase	0.000313389
K02470	K02470: DNA gyrase subunit B	0.00154842
K02471	K02471: putative ATP-binding cassette transporter	1.43447e-06
K02472	K02472: UDP-N-acetyl-D-mannosaminuronic acid dehydrogenase	0.000229962
K02474	K02474: UDP-N-acetyl-D-galactosamine dehydrogenase	0.00025911
K02475	K02475: two-component system, CitB family, response regulator	4.96897e-05
K02476	K02476: two-component system, CitB family, sensor kinase	2.58948e-05
K02477	K02477: two-component system, LytT family, response regulator	0.000223063
K02478	K02478: two-component system, LytT family, sensor kinase	9.96844e-05
K02479	K02479: two-component system, NarL family, response regulator	0.000548814
K01659	K01659: 2-methylcitrate synthase	8.33255e-05
K01658	K01658: anthranilate synthase component II	0.000341689
K13581	K13581	4.23174e-05
K13587	K13587	0.000194847
K13584	K13584	4.56564e-06
K01653	K01653: acetolactate synthase I/III small subunit	0.000555481
K01652	K01652: acetolactate synthase I/II/III large subunit	0.00120594
K01654	K01654: N-acetylneuraminate synthase	0.000172294
K01657	K01657: anthranilate synthase component I	0.00037164
K02874	K02874: large subunit ribosomal protein L14	0.00154326
K02876	K02876: large subunit ribosomal protein L15	0.00114711
K02877	K02877: large subunit ribosomal protein L15e	0.000413519
K02871	K02871: large subunit ribosomal protein L13	0.000881475
K13075	K13075	7.12323e-05
K11737	K11737: D-serine/D-alanine/glycine transporter	1.30398e-05
K02878	K02878: large subunit ribosomal protein L16	0.00102145
K02879	K02879: large subunit ribosomal protein L17	0.000601481
K11736	K11736: proline-specific permease ProY	2.74245e-06
K05556	K05556: hydroxylacyl-CoA dehydrogenase	3.61624e-23
K02053	K02053: putative spermidine/putrescine transport system permease protein	0.000136358
K02050	K02050: sulfonate/nitrate/taurine transport system permease protein	0.000723866
K05555	K05555: cyclase	1.00453e-05
K02056	K02056: simple sugar transport system ATP-binding protein	0.00174021
K02057	K02057: simple sugar transport system permease protein	0.00215505
K02054	K02054: putative spermidine/putrescine transport system permease protein	8.08986e-05
K05551	K05551: 3-oxoacyl-ACP synthase I	1.21195e-05
K03503	K03503: DNA polymerase V	3.29466e-05
K03502	K03502: DNA polymerase V	0.000298665
K03501	K03501: glucose inhibited division protein B	0.000557844
K03500	K03500: ribosomal RNA small subunit methyltransferase B	0.00035912
K05559	K05559: multicomponent K+:H+ antiporter subunit A	2.18835e-05
K03894	K03894: aerobactin synthetase subunit alpha	1.01134e-05
K03897	K03897: lysine N6-hydroxylase	1.60177e-21
K03896	K03896: acetyl CoA:N6-hydroxylysine acetyl transferase	9.44131e-06
K03891	K03891: ubiquinol-cytochrome c reductase cytochrome b subunit	1.08837e-05
K03893	K03893: arsenical pump membrane protein	3.30027e-06
K03892	K03892: ArsR family transcriptional regulator	0.00117493
K10844	K10844: DNA excision repair protein ERCC-2	2.75279e-05
K02278	K02278: prepilin peptidase CpaA	2.60184e-05
K02279	K02279: pilus assembly protein CpaB	9.12611e-06
K09157	K09157: hypothetical protein	0.000740993
K09743	K09743: hypothetical protein	0.000106864
K06020	K06020: sulfate-transporting ATPase	0.000677175
K09747	K09747: hypothetical protein	0.000867307
K02277	K02277: cytochrome c oxidase subunit IV	1.35611e-05
K02274	K02274: cytochrome c oxidase subunit I	1.61756e-05
K02275	K02275: cytochrome c oxidase subunit II	2.03607e-05
K14055	K14055	0.000197365
K03520	K03520: carbon-monoxide dehydrogenase large subunit	4.85166e-05
K11442	K11442: putative uridylyltransferase	1.13381e-05
K13292	K13292	0.000594072
K02858	K02858: 3,4-dihydroxy 2-butanone 4-phosphate synthase	0.000857523
K03477	K03477: DeoR family transcriptional regulator, ulaG and ulaABCDEF operon	4.97113e-05
K12988	K12988	3.9914e-05
K03475	K03475: PTS system, ascorbate-specific IIC component	8.04644e-05
K02859	K02859: riboflavin biosynthesis RibT protein	2.44556e-05
K03473	K03473: erythronate-4-phosphate dehydrogenase	6.54577e-05
K03472	K03472: D-erythrose 4-phosphate dehydrogenase	1.60708e-05
K03471	K03471: ribonuclease HIII	6.35817e-05
K03470	K03470: ribonuclease HII	0.00112948
K14051	K14051	0.000128759
K12982	K12982	2.30801e-05
K12984	K12984	0.000281577
K12987	K12987	0.000126515
K03478	K03478: hypothetical protein	8.41464e-05
K05345	K05345: putative cyclase	3.54572e-05
K13853	K13853	0.00026012
K12507	K12507: acyl-CoA synthetase	3.02736e-05
K12506	K12506: 2-C-methyl-D-erythritol 4-phosphate cytidylyltransferase /	3.07614e-05
K03091	K03091: RNA polymerase sporulation-specific sigma factor	0.00102382
K03090	K03090: RNA polymerase sigma-B factor	0.000114428
K03093	K03093: RNA polymerase sigma factor	2.58372e-05
K03092	K03092: RNA polymerase sigma-54 factor	0.00038143
K02852	K02852: UDP-N-acetyl-D-mannosaminuronic acid transferase	1.74557e-06
K02304	K02304: precorrin-2 dehydrogenase / sirohydrochlorin ferrochelatase	0.00010851
K02302	K02302: uroporphyrin-III C-methyltransferase / precorrin-2 dehydrogenase /	0.000213148
K02303	K02303: uroporphyrin-III C-methyltransferase	0.00037306
K02300	K02300: cytochrome o ubiquinol oxidase operon protein cyoD	1.21555e-05
K02301	K02301: protoheme IX farnesyltransferase	2.80912e-05
K02480	K02480: two-component system, NarL family, sensor kinase	4.4538e-05
K05349	K05349: beta-glucosidase	0.00115935
K02856	K02856: L-rhamnose-H+ transport protein	7.32733e-05
K13919	K13919	1.39475e-05
K07080	K07080	0.000117419
K14058	K14058	0.000107916
K03652	K03652: DNA-3-methyladenine glycosylase	0.000316585
K03651	K03651: Icc protein	2.27889e-05
K03650	K03650: tRNA modification GTPase	0.000909061
K03657	K03657: DNA helicase II / ATP-dependent DNA helicase PcrA	0.00123582
K03656	K03656: ATP-dependent DNA helicase Rep	0.000185258
K03655	K03655: ATP-dependent DNA helicase RecG	0.000694205
K03654	K03654: ATP-dependent DNA helicase RecQ	0.000848481
K02855	K02855: AraC family transcriptional regulator, L-rhamnose operon regulatory	1.61355e-05
K08693	K08693: 3'-nucleotidase	5.61815e-05
K06045	K06045: squalene-hopene cyclase	2.23117e-05
K11748	K11748: glutathione-regulated potassium-efflux system ancillary protein KefG	1.63035e-05
K11749	K11749: regulator of sigma E protease	0.000181947
K11746	K11746: glutathione-regulated potassium-efflux system ancillary protein KefF	8.19628e-06
K11747	K11747: glutathione-regulated potassium-efflux system protein KefB	0.000129584
K11744	K11744: AI-2 transport protein TqsA	8.1284e-05
K11745	K11745: glutathione-regulated potassium-efflux system ancillary protein KefC	3.80854e-05
K11742	K11742: spermidine export protein MdtI	4.29349e-05
K11743	K11743: spermidine export protein MdtJ	1.23355e-05
K11740	K11740: bacteriophage N4 adsorption protein B	2.42507e-06
K11741	K11741: quaternary ammonium compound-resistance protein SugE	0.00071742
K13920	K13920	1.70885e-05
K13921	K13921	3.04978e-05
K13922	K13922	4.3317e-05
K13923	K13923	0.000160168
K13925	K13925	4.2139e-06
K13926	K13926	5.63511e-05
K13927	K13927	1.57881e-06
K13928	K13928	4.19932e-14
K13929	K13929	2.42338e-05
K12433	K12433: polyketide synthase 5	9.89205e-07
K12432	K12432: polyketide synthase 3/4	1.23547e-06
K12435	K12435: polyketide synthase 8	1.72191e-06
K12434	K12434: polyketide synthase 7	1.15902e-06
K12437	K12437: polyketide synthase 13	1.07475e-06
K12436	K12436: polyketide synthase 12	4.29708e-07
K09923	K09923: hypothetical protein	2.85486e-10
K06202	K06202: CyaY protein	1.40729e-05
K09921	K09921: hypothetical protein	6.34775e-06
K06200	K06200: carbon starvation protein	0.000167245
K06207	K06207: GTP-binding protein	0.000922154
K06206	K06206: sugar fermentation stimulation protein A	0.00029062
K06205	K06205: MioC protein	9.97527e-06
K09924	K09924: hypothetical protein	3.78547e-05
K06209	K06209: chorismate mutase	0.000119644
K04844	K04844: hypothetical glycosyl hydrolase	2.05585e-05
K11632	K11632: bacitracin transport system permease protein	3.49848e-11
K11633	K11633: two-component system, OmpR family, sensor histidine kinase YxdK	1.82004e-05
K11630	K11630: two-component system, OmpR family, bacitracin resistance response	1.88115e-05
K11631	K11631: bacitracin transport system ATP-binding protein	2.12455e-05
K06597	K06597: chemosensory pili system protein ChpB (putative protein-glutamate	7.66953e-06
K06596	K06596: chemosensory pili system protein ChpA (sensor histidine	9.36397e-06
K06595	K06595: heam-based aerotactic trancducer	6.96268e-06
K11635	K11635: putative ABC transport system ATP-binding protein	1.4235e-05
K06599	K06599: AraC family transcriptional regulator, chemosensory pili system	5.65048e-06
K11639	K11639: Mg2+/citrate complex secondary transporter	1.21434e-06
K06979	K06979	3.50313e-05
K06978	K06978	2.25612e-05
K07979	K07979: GntR family transcriptional regulator	0.000456989
K06971	K06971	3.99795e-05
K06970	K06970: ribosomal RNA large subunit methyltransferase F	8.96406e-06
K06973	K06973	0.000378888
K06972	K06972	7.03789e-05
K06975	K06975	4.95476e-05
K06976	K06976	1.63461e-06
K07082	K07082	0.000291196
K00759	K00759: adenine phosphoribosyltransferase	0.0010248
K00758	K00758: thymidine phosphorylase	0.00013643
K07084	K07084	3.79993e-05
K07085	K07085	0.000209636
K07088	K07088	0.000169716
K07089	K07089	0.000447292
K00757	K00757: uridine phosphorylase	0.00032077
K00756	K00756: pyrimidine-nucleoside phosphorylase	0.000302968
K00754	K00754	0.000157961
K10907	K10907: aminotransferase	0.000499247
K07570	K07570: general stress protein 13	4.40663e-05
K07571	K07571: S1 RNA binding domain protein	0.000246934
K07576	K07576: metallo-beta-lactamase family protein	0.000465286
K07577	K07577: putative mRNA 3-end processing factor	6.04643e-05
K07574	K07574: putative RNA-binding protein containing KH domain	0.000294071
K07575	K07575: PUA domain protein	5.62915e-05
K07579	K07579: putative methylase	7.51918e-05
K10909	K10909: two-component system, autoinducer 2 sensor kinase/phosphatase LuxQ	4.70969e-05
K00244	K00244: fumarate reductase flavoprotein subunit	0.000191005
K00611	K00611: ornithine carbamoyltransferase	0.00118729
K11189	K11189: phosphocarrier protein	0.000604072
K06379	K06379: stage II sporulation protein AB (anti-sigma F factor)	0.000152072
K06378	K06378: stage II sporulation protein AA (anti-sigma F factor antagonist)	0.000410081
K11184	K11184: catabolite repression HPr-like protein	6.91376e-05
K09816	K09816: zinc transport system permease protein	0.000398221
K09815	K09815: zinc transport system substrate-binding protein	9.81038e-05
K06374	K06374: spore maturation protein B	0.000240789
K06373	K06373: spore maturation protein A	0.000214036
K09812	K09812: cell division transport system ATP-binding protein	0.000667295
K09811	K09811: cell division transport system permease protein	0.000144864
K06370	K06370: morphogenetic protein associated with SpoVID	2.5631e-06
K06006	K06006: periplasmic protein CpxP	9.44335e-06
K10763	K10763: DnaA-homolog protein	8.18462e-05
K01938	K01938: formate--tetrahydrofolate ligase	0.000808061
K01939	K01939: adenylosuccinate synthase	0.00119403
K01934	K01934: 5-formyltetrahydrofolate cyclo-ligase	0.000170337
K01935	K01935: dethiobiotin synthetase	9.88972e-05
K01937	K01937: CTP synthase	0.00111026
K01932	K01932	5.9896e-06
K01933	K01933: phosphoribosylformylglycinamidine cyclo-ligase	0.000793243
K00356	K00356: NADH dehydrogenase	0.000176223
K00355	K00355: NAD(P)H dehydrogenase (quinone)	1.93432e-05
K02352	K02352: drp35	1.33984e-05
K00962	K00962: polyribonucleotide nucleotidyltransferase	0.0010067
K00351	K00351: Na+-transporting NADH:ubiquinone oxidoreductase subunit F	0.00011887
K00350	K00350: Na+-transporting NADH:ubiquinone oxidoreductase subunit E	0.000310633
K07796	K07796: Cu(I)/Ag(I) efflux system outer membrane protein CusC	0.000112963
K07797	K07797: multidrug resistance protein K	3.85513e-07
K07795	K07795: putative tricarboxylic transport membrane protein	9.99635e-05
K07792	K07792: anaerobic C4-dicarboxylate transporter DcuB	3.5099e-05
K07793	K07793: putative tricarboxylic transport membrane protein	0.000466969
K00359	K00359: NADH oxidase	0.000681108
K00358	K00358	2.4799e-05
K00689	K00689: dextransucrase	3.92743e-06
K00688	K00688: starch phosphorylase	0.000770283
K07152	K07152	2.59203e-05
K07154	K07154	0.000185782
K07156	K07156	2.3621e-05
K07406	K07406: alpha-galactosidase	0.000137108
K07159	K07159	0.000197852
K07404	K07404: 6-phosphogluconolactonase	0.000162776
K07402	K07402: xanthine dehydrogenase accessory factor	0.000414958
K07403	K07403: membrane-bound serine protease (ClpP class)	5.20224e-05
K00687	K00687: penicillin-binding protein 2B	3.89564e-05
K07401	K07401: selenoprotein W-related protein	1.53667e-05
K03839	K03839: flavodoxin I	8.94689e-05
K11615	K11615: two-component system, CitB family, response regulator MalR	6.88184e-05
K09819	K09819: manganese/iron transport system permease protein	0.000306254
K05552	K05552: 3-oxoacyl-ACP synthase II	1.29935e-06
K09818	K09818: manganese/iron transport system substrate-binding protein	5.85758e-05
K10440	K10440: ribose transport system permease protein	0.000803952
K09817	K09817: zinc transport system ATP-binding protein	0.00103278
K05833	K05833: putative ABC transport system ATP-binding protein	0.000484891
K05832	K05832: putative ABC transport system permease protein	0.000381445
K05835	K05835: threonine efflux protein	7.24137e-06
K05834	K05834: homoserine/homoserine lactone efflux protein	1.45024e-05
K05837	K05837: rod shape determining protein RodA	0.000423132
K05836	K05836: GntR family transcriptional regulator, histidine utilization	5.68878e-05
K05839	K05839: haemolysin expression modulating protein	1.28586e-06
K05838	K05838: putative thioredoxin	3.96669e-05
K03581	K03581: exodeoxyribonuclease V alpha subunit	0.000346079
K04769	K04769: AbrB family transcriptional regulator, stage V sporulation protein T	0.000231849
K10975	K10975: allantoin permease	3.08289e-06
K01808	K01808: ribose 5-phosphate isomerase B	0.000896114
K01809	K01809: mannose-6-phosphate isomerase	0.00044853
K09814	K09814: hemin transport system ATP-binding protein	5.21703e-06
K00537	K00537: arsenate reductase	0.000235515
K01800	K01800: maleylacetoacetate isomerase	6.90613e-06
K09813	K09813: hemin transport system permease protein	2.16352e-06
K01802	K01802: peptidylprolyl isomerase	0.000271543
K01803	K01803: triosephosphate isomerase (TIM)	0.00124874
K01804	K01804: L-arabinose isomerase	0.000142641
K01805	K01805: xylose isomerase	0.000171576
K01807	K01807: ribose 5-phosphate isomerase A	0.000456668
K11912	K11912: serine/threonine-protein kinase PpkA	8.21458e-06
K03188	K03188: urease accessory protein	2.00142e-05
K11029	K11029: anthrax edema toxin adenylate cyclase	1.80036e-05
K11183	K11183: phosphocarrier protein FPr	4.25728e-05
K10233	K10233: alpha-glucoside transport system permease protein	2.52409e-05
K04057	K04057: type III secretion protein SctP	1.14376e-06
K09826	K09826: Fur family transcriptional regulator, iron response regulator	1.10917e-12
K13607	K13607	1.23588e-05
K07494	K07494: putative transposase	0.000208978
K01246	K01246: DNA-3-methyladenine glycosylase I	0.00029243
K01247	K01247: DNA-3-methyladenine glycosylase II	0.000204005
K00929	K00929: butyrate kinase	0.000481249
K01243	K01243: S-adenosylhomocysteine/5'-methylthioadenosine nucleosidase	8.757e-05
K01241	K01241: AMP nucleosidase	3.64996e-05
K10015	K10015: histidine transport system permease protein	3.62095e-14
K10014	K10014: histidine transport system substrate-binding protein	1.67496e-05
K10017	K10017: histidine transport system ATP-binding protein	1.65104e-05
K14261	K14261	0.00024922
K10011	K10011: UDP-GlcUA decarboxylase/UDP-L-Ara4N formyltransferase	3.81353e-05
K10010	K10010: cystine transport system ATP-binding protein	8.90072e-05
K10013	K10013: lysine/arginine/ornithine transport system substrate-binding protein	1.42516e-05
K10012	K10012: undecaprenyl-phosphate 4-deoxy-4-formamido-L-arabinose transferase	0.000258954
K14268	K14268	8.21112e-06
K14269	K14269	4.00922e-06
K00805	K00805: trans-hexaprenyltranstransferase	0.000238771
K02919	K02919: large subunit ribosomal protein L36	0.000323198
K02913	K02913: large subunit ribosomal protein L33	0.00113255
K02912	K02912: large subunit ribosomal protein L32e	1.39725e-05
K02911	K02911: large subunit ribosomal protein L32	0.00041336
K02916	K02916: large subunit ribosomal protein L35	0.000302126
K02914	K02914: large subunit ribosomal protein L34	0.00101298
K12308	K12308: beta-galactosidase	0.000103601
K00228	K00228: coproporphyrinogen III oxidase	1.52983e-05
K00226	K00226: dihydroorotate oxidase	0.00103533
K01338	K01338: ATP-dependent Lon protease	0.000880104
K00224	K00224	3.32974e-06
K00220	K00220: cyclohexadienyl dehydrogenase	2.42193e-05
K02683	K02683: DNA primase	0.00025943
K02682	K02682: prepilin peptidase dependent protein D	6.39e-05
K02680	K02680: prepilin peptidase dependent protein B	2.93796e-05
K02687	K02687: ribosomal protein L11 methyltransferase	0.000491459
K01790	K01790: dTDP-4-dehydrorhamnose 3,5-epimerase	0.000608573
K01791	K01791: UDP-N-acetylglucosamine 2-epimerase	0.000663907
K01792	K01792: glucose-6-phosphate 1-epimerase	2.47754e-05
K02688	K02688: transcriptional regulator, propionate catabolism operon regulatory	0.000181662
K01066	K01066: esterase / lipase	0.000247415
K01795	K01795	0.000270397
K01796	K01796: alpha-methylacyl-CoA racemase	3.0522e-05
K00824	K00824: D-alanine transaminase	6.40851e-05
K00826	K00826: branched-chain amino acid aminotransferase	0.00106876
K00821	K00821: acetylornithine/N-succinyldiaminopimelate aminotransferase	0.000220501
K00820	K00820: glucosamine--fructose-6-phosphate aminotransferase (isomerizing)	0.000763961
K00823	K00823: 4-aminobutyrate aminotransferase	6.9323e-05
K13660	K13660	1.68226e-08
K05499	K05499: LacI family transcriptional regulator, repressor for deo operon,	0.0001264
K13668	K13668	3.1642e-05
K02836	K02836: peptide chain release factor RF-2	0.00080491
K06442	K06442: putative hemolysin	0.000427395
K01488	K01488: adenosine deaminase	0.000320383
K01489	K01489: cytidine deaminase	0.00054933
K01484	K01484: succinylarginine dihydrolase	3.33719e-06
K01485	K01485: cytosine deaminase	2.68952e-05
K01486	K01486: adenine deaminase	0.000428895
K03294	K03294: basic amino acid/polyamine antiporter, APA family	0.000316812
K01480	K01480: agmatinase	0.000437371
K01482	K01482: dimethylargininase	5.88838e-06
K01483	K01483: ureidoglycolate hydrolase	9.1517e-06
K01664	K01664: para-aminobenzoate synthetase component II	0.000191038
K01665	K01665: para-aminobenzoate synthetase component I	3.90647e-05
K01666	K01666: 4-hydroxy 2-oxovalerate aldolase	3.24185e-05
K01667	K01667: tryptophanase	0.000509039
K01661	K01661: naphthoate synthase	0.000158392
K01662	K01662: 1-deoxy-D-xylulose-5-phosphate synthase	0.000842955
K05308	K05308: gluconate dehydratase	1.1785e-05
K02467	K02467: GutQ protein	2.12447e-05
K05306	K05306: phosphonoacetaldehyde hydrolase	2.82497e-05
K02464	K02464: general secretion pathway protein O	4.11489e-06
K02463	K02463: general secretion pathway protein N	9.43597e-06
K01669	K01669: deoxyribodipyrimidine photo-lyase	1.00108e-05
K02461	K02461: general secretion pathway protein L	7.04914e-06
K02460	K02460: general secretion pathway protein K	1.9473e-05
K01466	K01466: allantoinase	0.000145956
K01467	K01467: beta-lactamase	4.30699e-05
K01464	K01464: dihydropyrimidinase	0.000218709
K01465	K01465: dihydroorotase	0.00102981
K01462	K01462	0.00112911
K01463	K01463	0.000326211
K01460	K01460: glutathionylspermidine amidase	1.20495e-05
K01461	K01461	0.000101366
K13599	K13599	4.90254e-05
K13598	K13598	6.05352e-05
K01468	K01468: imidazolonepropionase	0.000492105
K01469	K01469: 5-oxoprolinase (ATP-hydrolysing)	1.35839e-05
K02863	K02863: large subunit ribosomal protein L1	0.00104613
K02948	K02948: small subunit ribosomal protein S11	0.00133216
K13063	K13063	3.47823e-06
K02860	K02860: 16S rRNA processing protein RimM	0.000144862
K09251	K09251: putrescine aminotransferase	3.99215e-05
K02866	K02866: large subunit ribosomal protein L10e	0.000372326
K02864	K02864: large subunit ribosomal protein L10	0.000457964
K13069	K13069	0.000246598
K02869	K02869: large subunit ribosomal protein L12	0.00019628
K02041	K02041: phosphonate transport system ATP-binding protein	0.000326934
K02040	K02040: phosphate transport system substrate-binding protein	0.000525441
K02043	K02043: GntR family transcriptional regulator, phosphonate transport system	5.77612e-06
K02042	K02042: phosphonate transport system permease protein	0.00025661
K05541	K05541: tRNA-dihydrouridine synthase C	0.000188192
K05540	K05540: tRNA-dihydrouridine synthase B	0.000509952
K02047	K02047: sulfate transport system permease protein	0.000126008
K02046	K02046: sulfate transport system permease protein	5.22641e-05
K02049	K02049: sulfonate/nitrate/taurine transport system ATP-binding protein	0.00161746
K02048	K02048: sulfate transport system substrate-binding protein	3.14281e-05
K05549	K05549: benzoate 1,2-dioxygenase alpha subunit	1.0806e-06
K05548	K05548: MFS transporter, AAHS family, benzoate transport protein	3.64893e-06
K03078	K03078: 3-dehydro-L-gulonate-6-phosphate decarboxylase	1.38123e-05
K03319	K03319: divalent anion:Na+ symporter, DASS family	6.25462e-06
K03316	K03316: monovalent cation:H+ antiporter, CPA1 family	4.61989e-05
K03317	K03317: concentrative nucleoside transporter, CNT family	8.40451e-05
K03314	K03314: Na+:H+ antiporter, NhaB family	5.49234e-05
K03315	K03315: Na+:H+ antiporter, NhaC family	0.00017063
K03312	K03312: glutamate:Na+ symporter, ESS family	0.000104311
K03313	K03313: Na+:H+ antiporter, NhaA family	0.000163024
K03310	K03310: alanine or glycine:cation symporter, AGCS family	0.000712744
K03311	K03311: branched-chain amino acid:cation transporter, LIVCS family	4.37687e-05
K01426	K01426: amidase	0.000144061
K00869	K00869: mevalonate kinase	0.000283269
K03793	K03793: pteridine reductase	3.28168e-05
K03790	K03790: ribosomal-protein-alanine N-acetyltransferase	0.000144744
K13288	K13288	8.25304e-06
K03794	K03794: sirohydrochlorin ferrochelatase	5.15357e-05
K03795	K03795: sirohydrochlorin cobaltochelatase	1.16629e-05
K03798	K03798: cell division protease FtsH	0.00112928
K07799	K07799: putative multidrug efflux transporter MdtA	0.000165632
K13280	K13280	1.24912e-05
K13283	K13283	4.93951e-06
K13282	K13282	2.24239e-05
K03402	K03402: transcriptional regulator of arginine metabolism	0.000276035
K07645	K07645: two-component system, OmpR family, sensor histidine kinase QseC	1.37185e-05
K03406	K03406: methyl-accepting chemotaxis protein	0.000703977
K03407	K03407: two-component system, chemotaxis family, sensor kinase CheA	0.000383632
K03404	K03404: magnesium chelatase subunit ChlD	0.000354652
K03405	K03405: magnesium chelatase subunit ChlI	7.04864e-05
K03408	K03408: purine-binding chemotaxis protein CheW	0.0006382
K03409	K03409: chemotaxis protein CheX	6.82942e-05
K12538	K12538: outer membrane protein HasF	1.53904e-07
K00639	K00639: glycine C-acetyltransferase	0.000872783
K12530	K12530: ATP-binding cassette, subfamily B, bacterial RtxB	1.34353e-05
K12531	K12531: ATP-binding cassette, subfamily B, bacterial RtxE	8.69024e-06
K12532	K12532: RTX toxin transporter	3.84985e-05
K09858	K09858: SEC-C motif domain protein	7.63536e-05
K12536	K12536: ATP-binding cassette, subfamily C, bacterial HasD	1.42934e-05
K12537	K12537: protease secretion protein HasE	3.37494e-06
K02315	K02315: DNA replication protein DnaC	0.000129836
K02314	K02314: replicative DNA helicase	0.00102337
K02317	K02317: DNA replication protein DnaT	8.33367e-06
K02316	K02316: DNA primase	0.000571511
K06166	K06166: PhnG protein	1.98897e-05
K06167	K06167: PhnP protein	0.000119316
K02313	K02313: chromosomal replication initiator protein DnaA	0.00042139
K02312	K02312: 2,3-dihydroxybenzoate-AMP ligase	3.89538e-05
K03222	K03222: type III secretion protein SctJ	5.54543e-06
K03223	K03223: type III secretion protein SctL	6.93468e-06
K06168	K06168: bifunctional enzyme involved in thiolation and methylation of tRNA	0.00133659
K03221	K03221: type III secretion protein SctF	1.91616e-33
K02319	K02319: DNA polymerase I	2.07694e-06
K03227	K03227: type III secretion protein SctS	8.37584e-08
K03224	K03224: ATP synthase in type III secretion protein SctN	3.63009e-05
K07150	K07150	0.000170527
K09999	K09999: arginine transport system permease protein	3.69386e-05
K09482	K09482: glutamyl-tRNA(Gln) amidotransferase subunit D	0.000162975
K07151	K07151: dolichyl-diphosphooligosaccharide--protein glycosyltransferase	2.5002e-05
K02019	K02019: molybdate transport system regulatory protein	0.000100001
K07326	K07326: hemolysin activation/secretion protein	2.65431e-06
K01686	K01686: mannonate dehydratase	0.00052139
K05778	K05778: putative thiamine transport system permease protein	2.91922e-06
K01687	K01687: dihydroxy-acid dehydratase	0.00109881
K02014	K02014: iron complex outermembrane recepter protein	0.000633867
K08681	K08681: glutamine amidotransferase	0.000205348
K08680	K08680: 2-succinyl-6-hydroxy-2,4-cyclohexadiene-1-carboxylate synthase	0.000128989
K08682	K08682: acyl carrier protein phosphodiesterase	2.12398e-14
K12152	K12152: phosphatase NudJ	9.40114e-06
K02549	K02549: O-succinylbenzoate synthase	1.2128e-05
K12150	K12150: HIT-like protein HinT	0.000156193
K12151	K12151: multiple stress resistance protein BhsA	1.75497e-05
K11755	K11755: phosphoribosyl-ATP pyrophosphohydrolase / phosphoribosyl-AMP	0.000434225
K11754	K11754: dihydrofolate synthase / folylpolyglutamate synthase [EC:6.3.2.12	0.00062597
K11751	K11751: 5'-nucleotidase / UDP-sugar diphosphatase	1.49111e-05
K11750	K11750: esterase FrsA	7.1977e-06
K11753	K11753: riboflavin kinase / FMN adenylyltransferase	0.00057217
K11752	K11752: diaminohydroxyphosphoribosylaminopyrimidine deaminase /	0.000572061
K03136	K03136: transcription initiation factor TFIIE alpha subunit	6.93826e-05
K07158	K07158	2.34917e-05
K02407	K02407: flagellar hook-associated protein 2	4.73057e-05
K07407	K07407: alpha-galactosidase	0.000179044
K13935	K13935	5.10364e-06
K02406	K02406: flagellin	0.000411459
K13933	K13933	1.93044e-05
K13932	K13932	5.19765e-06
K13931	K13931	3.74782e-16
K13930	K13930	5.09123e-06
K04095	K04095: cell filamentation protein	0.000308198
K07712	K07712: two-component system, NtrC family, nitrogen regulation response	0.000335237
K04835	K04835: methylaspartate ammonia-lyase	0.000140656
K09790	K09790: hypothetical protein	0.000123534
K11620	K11620: lia operon protein LiaH	3.69878e-05
K11623	K11623: two-component system, NarL family, sensor histidine kinase YdfH	3.17315e-07
K09793	K09793: hypothetical protein	9.3233e-06
K11625	K11625: membrane protein YdfJ	2.31478e-06
K11624	K11624: two-component system, NarL family, response regulator YdfI	1.57264e-05
K11626	K11626: putative sodium/glutamine symporter	3.23338e-05
K11629	K11629: two-component system, OmpR family, bacitracin resistance sensor	1.28885e-05
K11628	K11628: mycocerosic acid synthase	1.95075e-06
K00686	K00686: protein-glutamine gamma-glutamyltransferase	1.63926e-05
K07091	K07091: lipopolysaccharide export system permease protein	7.87538e-07
K07090	K07090	0.000930496
K07093	K07093	6.94439e-06
K07095	K07095	0.00025541
K07094	K07094	0.000156498
K07097	K07097	2.57194e-05
K01449	K01449: N-acetylmuramoyl-L-alanine amidase	0.00018732
K07099	K07099	0.000183194
K07098	K07098	0.000510398
K09612	K09612: alkaline phosphatase isozyme conversion protein	4.32383e-06
K07561	K07561: diphthamide synthase subunit DPH2	1.30108e-05
K07560	K07560: D-tyrosyl-tRNA(Tyr) deacylase	0.000668557
K07562	K07562: nonsense-mediated mRNA decay protein 3	7.74291e-05
K07567	K07567: TdcF protein	0.000910724
K12276	K12276: MSHA biogenesis protein MshE	1.89718e-05
K07569	K07569: RNA-binding protein	1.98897e-05
K07568	K07568: S-adenosylmethionine:tRNA ribosyltransferase-isomerase	0.00105865
K10979	K10979: DNA end-binding protein Ku	4.34229e-05
K11199	K11199: PTS system, 2-O-A-mannosyl-D-glycerate-specific IIB component	2.28704e-06
K11198	K11198: PTS system, 2-O-A-mannosyl-D-glycerate-specific IIA component	2.28704e-06
K11192	K11192: PTS system, N-acetylmuramic acid-specific IIC component	3.9883e-06
K11191	K11191: PTS system, N-acetylmuramic acid-specific IIB component	3.9883e-06
K09861	K09861: hypothetical protein	5.19786e-05
K06306	K06306: spore germination protein	4.1085e-05
K06307	K06307: spore germination protein	5.6589e-05
K11195	K11195: PTS system, fructose-specific IIB component	9.91689e-13
K11194	K11194: PTS system, fructose-specific IIA component	1.41364e-44
K08164	K08164: MFS transporter, DHA1 family, chloramphenicol resistance protein	3.37815e-05
K10713	K10713: formaldehyde-activating enzyme	7.14599e-05
K10710	K10710: fructoselysine 6-kinase	1.62756e-05
K10711	K10711: GntR family transcriptional regulator, frlABCD operon	2.00646e-05
K10716	K10716: voltage-gated potassium channel	8.84813e-05
K02490	K02490: two-component system, sporulation family, response regulator, stage	6.796e-05
K10715	K10715: two-component system, sensor histidine kinase	5.24828e-05
K11175	K11175: phosphoribosylglycinamide formyltransferase 1	0.000825583
K11177	K11177: xanthine dehydrogenase YagR molybdenum-binding subunit	3.11146e-05
K11176	K11176: IMP cyclohydrolase	6.92038e-05
K01923	K01923: phosphoribosylaminoimidazole-succinocarboxamide synthase	0.00101387
K01922	K01922: phosphopantothenate-cysteine ligase	2.8044e-14
K01921	K01921: D-alanine-D-alanine ligase	0.000582504
K01920	K01920: glutathione synthase	6.18324e-05
K01926	K01926: AT-rich DNA-binding protein	0.000296077
K01925	K01925: UDP-N-acetylmuramoylalanine--D-glutamate ligase	0.000463215
K01924	K01924: UDP-N-acetylmuramate--alanine ligase	0.000835684
K00322	K00322: NAD(P) transhydrogenase	9.58582e-05
K00321	K00321	1.1684e-05
K07789	K07789: RND superfamily, multidrug transport protein MdtC	0.000125724
K07788	K07788: RND superfamily, multidrug transport protein MdtB	7.92572e-05
K00324	K00324: NAD(P) transhydrogenase subunit alpha	0.000132642
K00325	K00325: NAD(P) transhydrogenase subunit beta	5.73782e-05
K07784	K07784: MFS transporter, OPA family, hexose phosphate transport protein UhpT	1.94343e-05
K07787	K07787: Cu(I)/Ag(I) efflux system membrane protein CusA	9.31834e-05
K07786	K07786: MFS transporter, multidrug resistance protein Y	3.04459e-06
K07783	K07783: MFS transporter, OPA family, sugar phosphate sensor protein UhpC	4.15755e-05
K05946	K05946: N-acetylglucosaminyldiphosphoundecaprenol	0.000120426
K06416	K06416: stage V sporulation protein S	5.20261e-05
K06945	K06945	0.000114211
K06946	K06946	9.85372e-12
K06415	K06415: stage V sporulation protein R	6.07844e-06
K06940	K06940	7.28837e-05
K06413	K06413: stage V sporulation protein K	6.98906e-05
K06410	K06410: dipicolinate synthase subunit A	1.76552e-05
K06411	K06411: dipicolinate synthase subunit B	5.23603e-05
K10806	K10806: acyl-CoA thioesterase YciA	2.25851e-05
K07146	K07146	7.22953e-05
K10804	K10804: acyl-CoA thioesterase I	3.48251e-05
K10805	K10805: acyl-CoA thioesterase II	1.56475e-05
K06948	K06948	1.09275e-05
K06949	K06949: ribosome biogenesis GTPase	0.000526895
K07141	K07141	2.25053e-05
K07140	K07140	9.753e-06
K02886	K02886: large subunit ribosomal protein L2	0.00149386
K09134	K09134: hypothetical protein	0.000258922
K02881	K02881: large subunit ribosomal protein L18	0.000782375
K09136	K09136: hypothetical protein	6.86709e-05
K09137	K09137: hypothetical protein	3.58639e-05
K09131	K09131: hypothetical protein	9.3233e-05
K01817	K01817: phosphoribosylanthranilate isomerase	0.000382032
K01816	K01816: hydroxypyruvate isomerase	6.18865e-05
K01815	K01815: 4-deoxy-L-threo-5-hexosulose-uronate ketol-isomerase	0.000187805
K01814	K01814: phosphoribosylformimino-5-aminoimidazole carboxamide ribotide	0.000875829
K05808	K05808: putative sigma-54 modulation protein	0.000374777
K05809	K05809: ribosome-associated inhibitor A	9.12503e-12
K01811	K01811: putative family 31 glucosidase	0.000157154
K01810	K01810: glucose-6-phosphate isomerase	0.000623653
K05804	K05804: right origin-binding protein	2.81864e-12
K05805	K05805: CreA protein	4.57268e-05
K01069	K01069: hydroxyacylglutathione hydrolase	0.000931542
K05807	K05807: putative lipoprotein	2.94816e-05
K05800	K05800: Lrp/AsnC family transcriptional regulator	8.32446e-05
K05801	K05801: DnaJ like chaperone protein	4.839e-05
K05802	K05802: potassium efflux system protein KefA	2.97996e-05
K05803	K05803: lipoprotein NlpI	4.7507e-06
K04047	K04047: starvation-inducible DNA-binding protein	6.18361e-05
K04046	K04046: hypothetical chaperone protein	3.31494e-06
K04045	K04045: molecular chaperone HscC	1.38277e-05
K04044	K04044: molecular chaperone HscA	4.23803e-05
K04043	K04043: molecular chaperone DnaK	0.00138795
K04042	K04042: bifunctional protein GlmU	0.000528374
K04041	K04041: fructose-1,6-bisphosphatase III	8.62007e-05
K04566	K04566: lysyl-tRNA synthetase, class I	7.13711e-05
K00782	K00782: hypothetical protein	8.86292e-05
K00783	K00783: hypothetical protein	0.000320862
K00784	K00784: ribonuclease Z	0.000438421
K00786	K00786	0.000218817
K00036	K00036: glucose-6-phosphate 1-dehydrogenase	0.000237845
K00037	K00037: 3-alpha-hydroxysteroid dehydrogenase	1.21984e-05
K00034	K00034: glucose 1-dehydrogenase	0.00015998
K00032	K00032: phosphogluconate 2-dehydrogenase	1.44561e-05
K00033	K00033: 6-phosphogluconate dehydrogenase	0.00074531
K00030	K00030: isocitrate dehydrogenase (NAD+)	0.000303963
K00031	K00031: isocitrate dehydrogenase	0.000441767
K01259	K01259: proline iminopeptidase	6.92776e-05
K01258	K01258: tripeptide aminopeptidase	0.000460835
K01255	K01255: leucyl aminopeptidase	0.00025761
K01256	K01256: aminopeptidase N	3.34409e-05
K01251	K01251: adenosylhomocysteinase	0.000949352
K01250	K01250: pyrimidine-specific ribonucleoside hydrolase	9.71316e-05
K10794	K10794: D-proline reductase (dithiol) PrdB	1.24519e-05
K07782	K07782: LuxR family transcriptional regulator	1.5132e-05
K02063	K02063: thiamine transport system permease protein	9.36997e-05
K10022	K10022: arginine/ornithine transport system substrate-binding protein	2.74106e-05
K10023	K10023: arginine/ornithine transport system permease protein	2.05351e-06
K10024	K10024: arginine/ornithine transport system permease protein	7.87176e-06
K10025	K10025: arginine/ornithine transport system ATP-binding protein	3.26448e-06
K10026	K10026: queuosine biosynthesis protein QueE	0.000264096
K10027	K10027: phytoene dehydrogenase	2.31548e-05
K09001	K09001: anhydro-N-acetylmuramic acid kinase	8.5286e-05
K09002	K09002: hypothetical protein	1.26417e-05
K09005	K09005: hypothetical protein	2.99689e-05
K09007	K09007: hypothetical protein	0.000383194
K05245	K05245: L-carnitine/gamma-butyrobetaine antiporter	1.36177e-07
K02067	K02067: putative ABC transport system substrate-binding protein	5.97755e-05
K08234	K08234: glyoxylase I family protein	4.64356e-05
K07678	K07678: two-component system, NarL family, sensor histidine kinase BarA	0.000295241
K01322	K01322: prolyl oligopeptidase	6.34375e-05
K05561	K05561: multicomponent K+:H+ antiporter subunit D	1.02675e-05
K00252	K00252: glutaryl-CoA dehydrogenase	1.15372e-05
K00253	K00253: isovaleryl-CoA dehydrogenase	2.91503e-05
K02064	K02064: thiamine transport system substrate-binding protein	0.000100106
K00257	K00257	0.00118111
K01079	K01079: phosphoserine phosphatase	0.00019574
K01078	K01078: acid phosphatase	2.08633e-06
K03339	K03339: 6-phospho-5-dehydro-2-deoxy-D-gluconate aldolase	5.09523e-05
K01071	K01071: oleoyl-[acyl-carrier-protein] hydrolase	2.43066e-05
K01070	K01070: S-formylglutathione hydrolase	2.66897e-05
K02674	K02674: type IV pilus assembly protein PilY1	9.06936e-06
K02672	K02672: type IV pilus assembly protein PilW	2.29839e-06
K02670	K02670: twitching motility protein PilU	4.95355e-05
K02671	K02671: type IV pilus assembly protein PilV	3.96734e-05
K13612	K13612	2.31389e-06
K00811	K00811: aspartate aminotransferase	0.000455851
K00812	K00812: aspartate aminotransferase	0.00130534
K13611	K13611	2.30732e-06
K13614	K13614	1.13188e-06
K00817	K00817: histidinol-phosphate aminotransferase	0.000980959
K00818	K00818: acetylornithine aminotransferase	0.000433845
K00819	K00819: ornithine--oxo-acid transaminase	0.000340833
K08304	K08304: membrane-bound lytic murein transglycosylase A	5.00126e-05
K08305	K08305: membrane-bound lytic murein transglycosylase B	2.05498e-05
K08306	K08306: membrane-bound lytic murein transglycosylase C	1.35579e-05
K08307	K08307: membrane-bound lytic murein transglycosylase D	0.000100129
K08300	K08300: ribonuclease E	7.92439e-05
K08301	K08301: ribonuclease G	0.000324496
K08302	K08302: tagatose 1,6-diphosphate aldolase	0.000110368
K08303	K08303: putative protease	0.000980259
K14470	K14470	4.28403e-07
K08308	K08308: membrane-bound lytic murein transglycosylase E	4.99009e-05
K08309	K08309: soluble lytic murein transglycosylase	0.000137398
K14475	K14475	1.59031e-08
K05794	K05794: tellurite resistance protein TerC	0.000325379
K05795	K05795: tellurium resistance protein TerD	1.55321e-05
K01499	K01499: methenyltetrahydromethanopterin cyclohydrolase	7.19482e-05
K05790	K05790: lipopolysaccharide biosynthesis protein WzzE	8.57315e-06
K01493	K01493: dCMP deaminase	0.000364763
K01491	K01491: methenyltetrahydrofolate cyclohydrolase	0.00100487
K01497	K01497: GTP cyclohydrolase II	0.000748089
K01496	K01496: phosphoribosyl-AMP cyclohydrolase	0.000810903
K01495	K01495: GTP cyclohydrolase I	0.000251607
K01494	K01494: dCTP deaminase	0.000207271
K01673	K01673: carbonic anhydrase	0.000361903
K02418	K02418: flagellar protein FliO/FliZ	1.83753e-05
K02419	K02419: flagellar biosynthetic protein FliP	0.000282955
K01677	K01677: fumarate hydratase subunit alpha	0.000372262
K01676	K01676: fumarate hydratase, class I	0.000298129
K02412	K02412: flagellum-specific ATP synthase	0.000176646
K02413	K02413: flagellar FliJ protein	1.01478e-05
K02410	K02410: flagellar motor switch protein FliG	0.000191805
K02411	K02411: flagellar assembly protein FliH	6.54264e-06
K02416	K02416: flagellar motor switch protein FliM	0.000123343
K02417	K02417: flagellar motor switch protein FliN/FliY	0.000165442
K02414	K02414: flagellar hook-length control protein FliK	1.74103e-05
K02415	K02415: flagellar FliL protein	3.21155e-05
K01474	K01474: N-methylhydantoinase B	7.1504e-06
K02788	K02788: PTS system, lactose-specific IIC component	8.64632e-06
K01476	K01476: arginase	9.49694e-05
K01470	K01470: creatinine amidohydrolase	0.000128305
K01473	K01473: N-methylhydantoinase A	2.83029e-05
K00433	K00433: chloride peroxidase	8.80359e-05
K02782	K02782: PTS system, glucitol/sorbitol-specific IIB component	1.36905e-05
K02783	K02783: PTS system, glucitol/sorbitol-specific IIC component	4.76657e-05
K02781	K02781: PTS system, glucitol/sorbitol-specific IIA component	2.49841e-05
K01479	K01479: formiminoglutamase	6.72041e-05
K02787	K02787: PTS system, lactose-specific IIB component	5.25603e-06
K02784	K02784: phosphocarrier protein HPr	2.09718e-05
K11915	K11915: serine/threonine protein phosphatase Stp1	3.3347e-05
K02899	K02899: large subunit ribosomal protein L27	0.00163639
K02896	K02896: large subunit ribosomal protein L24e	1.84716e-05
K02897	K02897: large subunit ribosomal protein L25	0.0001523
K02895	K02895: large subunit ribosomal protein L24	0.000228061
K02892	K02892: large subunit ribosomal protein L23	0.000381604
K13051	K13051	8.77529e-05
K13052	K13052	2.16092e-05
K05570	K05570: multicomponent Na+:H+ antiporter subunit F	1.63926e-05
K01786	K01786: L-ribulose-5-phosphate 4-epimerase	8.30779e-05
K01785	K01785: aldose 1-epimerase	0.000415663
K01784	K01784: UDP-glucose 4-epimerase	0.00198405
K01783	K01783: ribulose-phosphate 3-epimerase	0.00101797
K01782	K01782: 3-hydroxybutyryl-CoA epimerase	1.56543e-05
K01780	K01780	1.96774e-05
K02074	K02074: zinc/manganese transport system ATP-binding protein	0.00012093
K02075	K02075: zinc/manganese transport system permease protein	2.09574e-05
K02076	K02076: Fur family transcriptional regulator, zinc uptake regulator	6.40826e-06
K00435	K00435: peroxiredoxin	3.00126e-05
K02071	K02071: D-methionine transport system ATP-binding protein	0.000894601
K02072	K02072: D-methionine transport system permease protein	0.000390788
K01788	K01788: N-acylglucosamine-6-phosphate 2-epimerase	3.17253e-05
K02526	K02526: 2-keto-3-deoxygluconate permease	1.79945e-05
K02527	K02527: 3-deoxy-D-manno-octulosonic-acid transferase	0.00010721
K02525	K02525: LacI family transcriptional regulator, kdg operon repressor	1.54286e-05
K03309	K03309: dicarboxylate/amino acid:cation (Na+ or H+) symporter, DAACS family	5.56223e-05
K02523	K02523: octaprenyl-diphosphate synthase	0.000439017
K02520	K02520: translation initiation factor IF-3	0.000645343
K02521	K02521: LysR family transcriptional regulator, positive regulator for ilvC	1.51153e-05
K03305	K03305: proton-dependent oligopeptide transporter, POT family	8.35851e-05
K03307	K03307: solute:Na+ symporter, SSS family	0.000238107
K03306	K03306: inorganic phosphate transporter, PiT family	0.000571086
K02259	K02259: cytochrome c oxidase subunit XV assembly protein	8.41093e-06
K03303	K03303: lactate transporter, LctP family	4.31687e-05
K02529	K02529: LacI family transcriptional regulator	0.0013378
K03583	K03583: exodeoxyribonuclease V gamma subunit	2.77695e-05
K02099	K02099: AraC family transcriptional regulator, arabinose operon regulatory	0.000129399
K03781	K03781: catalase	0.00101616
K03780	K03780: L(+)-tartrate dehydratase beta subunit	3.98424e-05
K03783	K03783: purine-nucleoside phosphorylase	0.00103322
K03782	K03782: catalase/peroxidase	6.85904e-05
K03785	K03785: 3-dehydroquinate dehydratase I	5.57806e-05
K03784	K03784: purine-nucleoside phosphorylase	0.000356444
K03787	K03787: 5'-nucleotidase	0.000568274
K03786	K03786: 3-dehydroquinate dehydratase II	0.000502551
K03789	K03789: ribosomal-protein-alanine N-acetyltransferase	0.00022973
K02588	K02588: nitrogenase iron protein NifH	0.000862457
K03411	K03411: chemotaxis protein CheD	8.97823e-05
K03410	K03410: chemotaxis protein CheC	4.06644e-05
K03413	K03413: two-component system, chemotaxis family, response regulator CheY	0.00147424
K03412	K03412: protein-glutamate methylesterase, two-component system, chemotaxis	0.000329759
K03415	K03415: two-component system, chemotaxis family, response regulator CheV	0.000143357
K03414	K03414: chemotaxis protein CheZ	1.32122e-05
K03417	K03417: methylisocitrate lyase	1.58472e-05
K02624	K02624: IclR family transcriptional regulator, pca regulon regulatory	1.07519e-05
K09901	K09901: hypothetical protein	2.28591e-11
K02322	K02322: DNA polymerase II large subunit	0.000177471
K02323	K02323: DNA polymerase II small subunit	0.00014976
K06175	K06175: tRNA pseudouridine synthase C	8.53773e-05
K06174	K06174: ATP-binding cassette, sub-family E, member 1	0.000261383
K06177	K06177: ribosomal large subunit pseudouridine synthase A	0.000466465
K06176	K06176: tRNA pseudouridine synthase D	0.00017027
K03231	K03231: elongation factor EF-1 alpha subunit	0.000340099
K03230	K03230: type III secretion protein SctV	7.7582e-06
K03232	K03232: elongation factor EF-1 beta subunit	0.00011866
K02573	K02573: ferredoxin-type protein NapG	0.000121732
K06223	K06223: DNA adenine methylase	0.000399056
K03237	K03237: translation initiation factor eIF-2 alpha subunit	0.000113745
K03236	K03236: translation initiation factor eIF-1A	0.000305534
K09902	K09902: hypothetical protein	1.53786e-05
K14260	K14260	0.000195742
K12239	K12239: dihydroaeruginoic acid synthetase	4.15031e-06
K12238	K12238: pyochelin biosynthesis protein PchD	4.41529e-06
K13542	K13542	7.51135e-05
K13543	K13543	6.66486e-18
K13540	K13540	5.12494e-05
K13541	K13541	2.31604e-05
K12237	K12237: nonribosomal peptide synthetase VibF	6.18203e-07
K12234	K12234: F420-0:gamma-glutamyl ligase	9.93022e-05
K12144	K12144: hydrogenase-4 component I	3.38081e-05
K12410	K12410: NAD-dependent deacetylase	0.000789943
K12141	K12141: hydrogenase-4 component F	0.000154933
K12143	K12143: hydrogenase-4 component H	2.95468e-05
K12142	K12142: hydrogenase-4 component G	1.28332e-05
K12149	K12149: DNA-damage-inducible protein I	7.36655e-05
K12148	K12148: biofilm regulator BssS	2.02183e-13
K05994	K05994: bacterial leucyl aminopeptidase	4.76399e-05
K07312	K07312: putative dimethyl sulfoxide reductase subunit YnfH (DMSO reductase	5.39254e-06
K03124	K03124: transcription initiation factor TFIIB	0.000504664
K07310	K07310: putative dimethyl sulfoxide reductase subunit YnfF	1.93445e-05
K07311	K07311: putative dimethyl sulfoxide reductase subunit YnfG (DMSO reductase	7.9468e-05
K07316	K07316: adenine-specific DNA-methyltransferase	0.000136814
K07317	K07317: adenine-specific DNA-methyltransferase	2.87978e-06
K07315	K07315: sigma-B regulation protein RsbU (phosphoserine phosphatase)	0.000133219
K00945	K00945: cytidylate kinase	0.00110395
K13940	K13940	1.26974e-05
K07319	K07319: putative adenine-specific DNA-methyltransferase	0.000528433
K12093	K12093: cag pathogenicity island protein 8	2.82502e-07
K01813	K01813: L-rhamnose isomerase	0.00027295
K12090	K12090: cag pathogenicity island protein 5	5.98289e-06
K14187	K14187	6.31325e-05
K14053	K14053	4.95588e-06
K07798	K07798: Cu(I)/Ag(I) efflux system membrane protein CusB	1.42652e-05
K12527	K12527: putative selenate reductase	0.00026714
K12526	K12526: bifunctional diaminopimelate decarboxylase/aspartate kinase	1.63479e-06
K12525	K12525: bifunctional aspartokinase/homoserine dehydrogenase 2 [EC:2.7.2.4	3.08675e-05
K12524	K12524: bifunctional aspartokinase/homoserine dehydrogenase 1 [EC:2.7.2.4	0.00020015
K11618	K11618: two-component system, NarL family, response regulator LiaR	0.000100218
K09789	K09789: hypothetical protein	1.38882e-05
K09788	K09788: hypothetical protein	6.38655e-05
K09787	K09787: hypothetical protein	0.000106437
K09786	K09786: hypothetical protein	7.02073e-06
K11616	K11616: malate:Na+ symporter	3.98538e-05
K11617	K11617: two-component system, NarL family, sensor histidine kinase LiaS	2.82329e-05
K11610	K11610: beta-ketoacyl ACP reductase	5.00022e-05
K09781	K09781: hypothetical protein	1.46727e-05
K09780	K09780: hypothetical protein	2.32194e-05
K07584	K07584: hypothetical protein	3.91213e-05
K01812	K01812: glucuronate isomerase	0.000355302
K08191	K08191: MFS transporter, ACS family, hexuronate transporter	3.43715e-06
K02837	K02837: peptide chain release factor RF-3	0.000272439
K10563	K10563: formamidopyrimidine-DNA glycosylase	0.000341361
K02838	K02838: ribosome recycling factor	0.000916307
K07581	K07581: hypothetical protein	0.000342327
K02839	K02839: peptide chain release factor RF-H	4.68019e-05
K10441	K10441: ribose transport system ATP-binding protein	0.000999769
K12700	K12700	1.85959e-05
K10961	K10961: toxin co-regulated pilus biosynthesis protein I	7.59169e-07
K10963	K10963: toxin co-regulated pilus biosynthesis protein R	9.87897e-06
K07558	K07558: tRNA nucleotidyltransferase (CCA-adding enzyme) [EC:2.7.7.25	0.000165063
K07559	K07559: putative RNA 2'-phosphotransferase	4.91775e-05
K07228	K07228: TrkA domain protein	8.82675e-06
K07229	K07229	2.25346e-05
K07226	K07226: hypothetical protein	8.47572e-06
K03932	K03932: polyhydroxybutyrate depolymerase	1.99205e-05
K07224	K07224: putative lipoprotein	3.8847e-06
K07557	K07557: archaeosine tRNA-ribosyltransferase	7.13986e-05
K07222	K07222: putative flavoprotein involved in K+ transport	2.08645e-05
K07223	K07223: putative iron-dependent peroxidase	0.000133
K07220	K07220: hypothetical protein	0.000235277
K06041	K06041: arabinose-5-phosphate isomerase	0.000453426
K09879	K09879: isorenieratene synthase	2.28936e-06
K06311	K06311: spore germination protein	2.792e-05
K06310	K06310: spore germination protein	7.94226e-05
K06313	K06313: spore germination protein	3.31494e-06
K03423	K03423	0.000277605
K10709	K10709: protein FrlC	1.08096e-05
K03756	K03756: putrescine:ornithine antiporter	3.08081e-06
K00886	K00886: polyphosphate glucokinase	1.7217e-05
K03041	K03041: DNA-directed RNA polymerase subunit A'	0.000295843
K11384	K11384: two-component system, NtrC family, response regulator AlgB	9.60953e-05
K11385	K11385: arabinosyltransferase A	1.36355e-06
K11383	K11383: two-component system, NtrC family, sensor histidine kinase KinB	3.92407e-06
K11144	K11144: primosomal protein DnaI	1.51221e-05
K11145	K11145: ribonuclease III family protein	0.000195688
K05973	K05973: poly(3-hydroxybutyrate) depolymerase	3.65619e-06
K05979	K05979: 2-phosphosulfolactate phosphatase	6.68936e-06
K00331	K00331: NADH dehydrogenase I subunit B	0.0012214
K00330	K00330: NADH dehydrogenase I subunit A	0.000426116
K00333	K00333: NADH dehydrogenase I subunit D	0.000365486
K00332	K00332: NADH dehydrogenase I subunit C	7.5939e-05
K00335	K00335: NADH dehydrogenase I subunit F	0.00175142
K00334	K00334: NADH dehydrogenase I subunit E	0.00146352
K00337	K00337: NADH dehydrogenase I subunit H	0.000533662
K00336	K00336: NADH dehydrogenase I subunit G	0.00122739
K00339	K00339: NADH dehydrogenase I subunit J	0.000184057
K00338	K00338: NADH dehydrogenase I subunit I	0.00102212
K08715	K08715: inward rectifier potassium channel	1.41945e-05
K08659	K08659: dipeptidase A	4.42459e-05
K06405	K06405: stage V sporulation protein AC	0.000118191
K03617	K03617: electron transport complex protein RnfA	0.000608831
K06407	K06407: stage V sporulation protein AE	0.000264457
K06950	K06950	0.00117008
K06957	K06957	2.99424e-27
K06400	K06400: site-specific DNA recombinase	0.000168756
K06955	K06955	2.15308e-06
K06954	K06954	2.10821e-05
K10815	K10815: hydrogen cyanide synthase HcnB	3.67829e-05
K07133	K07133	0.000477078
K06959	K06959	0.000586125
K06958	K06958	0.000438983
K06409	K06409: stage V sporulation protein B	5.80354e-05
K06408	K06408: stage V sporulation protein AF	4.93055e-05
K09129	K09129: hypothetical protein	0.000342102
K03614	K03614: electron transport complex protein RnfD	0.000511531
K07102	K07102	4.94959e-06
K09123	K09123: hypothetical protein	0.000134056
K09122	K09122: hypothetical protein	4.13216e-05
K09121	K09121: hypothetical protein	0.000191741
K07101	K07101	0.000170715
K09125	K09125: hypothetical protein	0.000168575
K09124	K09124: hypothetical protein	1.83034e-06
K05819	K05819: MFS transporter, AAHS family, 3-hydroxyphenylpropionic acid	2.06185e-05
K03229	K03229: type III secretion protein SctU	1.13063e-06
K01866	K01866: tyrosyl-tRNA synthetase	0.0011577
K01867	K01867: tryptophanyl-tRNA synthetase	0.000772849
K01865	K01865	1.58662e-05
K05813	K05813: sn-glycerol 3-phosphate transport system substrate-binding protein	0.000203251
K05812	K05812: conserved hypothetical protein	1.37783e-05
K05811	K05811: putative lipoprotein	1.39414e-05
K05810	K05810: conserved hypothetical protein	0.000190785
K05817	K05817: LysR family transcriptional regulator, hca operon transcriptional	2.04365e-05
K05816	K05816: sn-glycerol 3-phosphate transport system ATP-binding protein	0.000175843
K05815	K05815: sn-glycerol 3-phosphate transport system permease protein	7.63803e-05
K05814	K05814: sn-glycerol 3-phosphate transport system permease protein	0.000300622
K04032	K04032: ethanolamine utilization cobalamin adenosyltransferase	4.05801e-05
K04030	K04030: ethanolamine utilization protein EutQ	1.01637e-05
K04031	K04031: ethanolamine utilization protein EutS	0.000154589
K07105	K07105	6.96322e-05
K07104	K07104	1.65786e-05
K01236	K01236: maltooligosyltrehalose trehalohydrolase	3.12571e-05
K07046	K07046	2.02037e-05
K07047	K07047	0.000149877
K07045	K07045	2.12186e-05
K00029	K00029: malate dehydrogenase (oxaloacetate-decarboxylating)(NADP+)	0.000331112
K00028	K00028: malate dehydrogenase (decarboxylating)	3.90315e-05
K00799	K00799: glutathione S-transferase	2.96542e-05
K00798	K00798: cob(I)alamin adenosyltransferase	0.000973783
K00797	K00797: spermidine synthase	0.000255966
K00024	K00024	0.000277393
K00795	K00795: geranyltranstransferase	0.000211375
K00794	K00794: riboflavin synthase beta chain	0.000632954
K00021	K00021: 3-hydroxy-3-methylglutaryl-CoA reductase	0.000291907
K00020	K00020: 3-hydroxyisobutyrate dehydrogenase	0.000388173
K07048	K07048	9.09628e-06
K00790	K00790: UDP-N-acetylglucosamine 1-carboxyvinyltransferase	0.00104633
K09017	K09017: TetR/AcrR family transcriptional regulator	0.000198672
K09016	K09016: putative pyrimidine permease RutG	1.30911e-06
K09015	K09015: Fe-S cluster assembly protein SufD	0.000100595
K09014	K09014: Fe-S cluster assembly protein SufB	0.000307117
K09013	K09013: Fe-S cluster assembly ATP-binding protein	0.000394554
K02769	K02769: PTS system, fructose-specific IIB component	7.61994e-05
K01261	K01261: glutamyl aminopeptidase	9.14249e-05
K01262	K01262: X-Pro aminopeptidase	0.000777775
K01263	K01263: cytosol alanyl aminopeptidase	1.33053e-05
K01265	K01265: methionyl aminopeptidase	0.000900319
K01266	K01266: D-aminopeptidase	0.000127425
K09018	K09018: putative monooxygenase RutA	3.90504e-06
K08227	K08227: MFS transporter, LPLT family, lysophospholipid transporter	7.4791e-06
K08225	K08225: MFS transporter, ENTS family, enterobactin (siderophore) exporter	1.07576e-05
K08224	K08224: MFS transporter, YNFM family, putative membrane transport protein	2.79208e-05
K08223	K08223: MFS transporter, FSR family, fosmidomycin resistance protein	7.46614e-05
K10039	K10039: putative glutamine transport system substrate-binding protein	0.000122759
K10038	K10038: glutamine transport system ATP-binding protein	9.55857e-05
K10037	K10037: glutamine transport system permease protein	4.50159e-05
K10036	K10036: glutamine transport system substrate-binding protein	6.27566e-05
K02335	K02335: DNA polymerase I	0.000702873
K06988	K06988	2.06107e-05
K02334	K02334: DNA polymerase bacteriophage-type	0.00129694
K04788	K04788: mycobactin phenyloxazoline synthetase	3.19191e-06
K04789	K04789: mycobactin peptide synthetase MbtE	3.01876e-06
K06989	K06989: aspartate dehydrogenase	0.000157946
K04784	K04784: yersiniabactin nonribosomal peptide synthetase	4.80399e-06
K04786	K04786: yersiniabactin nonribosomal peptide/polyketide synthase	1.458e-06
K04787	K04787: mycobactin salicyl-AMP ligase	2.1792e-06
K04780	K04780: nonribosomal peptide synthetase DhbF	1.15745e-05
K04781	K04781: salicylate synthetase	1.03115e-05
K04783	K04783: yersiniabactin salicyl-AMP ligase	1.56835e-06
K00249	K00249: acyl-CoA dehydrogenase	0.000272922
K01062	K01062: 1-alkyl-2-acetylglycerophosphocholine esterase	1.53786e-05
K01318	K01318: glutamyl endopeptidase	0.000109044
K02238	K02238: competence protein ComEC	0.000437254
K00241	K00241: succinate dehydrogenase cytochrome b-556 subunit	0.00013901
K00240	K00240: succinate dehydrogenase iron-sulfur protein	0.000322368
K00243	K00243: hypothetical protein	3.18141e-05
K00242	K00242: succinate dehydrogenase hydrophobic membrane anchor protein	1.17459e-05
K00245	K00245: fumarate reductase iron-sulfur protein	4.31704e-05
K07791	K07791: anaerobic C4-dicarboxylate transporter DcuA	2.23305e-05
K00247	K00247: fumarate reductase subunit D	1.14748e-05
K00246	K00246: fumarate reductase subunit C	5.98284e-06
K04767	K04767: acetoin utilization protein AcuB	0.000206754
K04764	K04764: integration host factor subunit alpha	1.08558e-06
K01061	K01061: carboxymethylenebutenolidase	2.81858e-05
K02669	K02669: twitching motility protein PilT	0.000965553
K02668	K02668: two-component system, NtrC family, sensor histidine kinase PilS	5.93817e-05
K04760	K04760: transcription elongation factor GreB	1.49829e-05
K04761	K04761: LysR family transcriptional regulator, hydrogen peroxide-inducible	0.000135118
K02664	K02664: type IV pilus assembly protein PilO	4.42e-05
K02667	K02667: two-component system, NtrC family, response regulator PilR	0.000118916
K02666	K02666: type IV pilus assembly protein PilQ	8.38876e-05
K02661	K02661: type IV pilus assembly protein PilK	7.67636e-06
K02660	K02660: twitching motility protein PilJ	3.81753e-05
K04768	K04768: acetoin utilization protein AcuC	5.03351e-05
K02662	K02662: type IV pilus assembly protein PilM	5.11298e-05
K00809	K00809: deoxyhypusine synthase	4.52039e-06
K00806	K00806: undecaprenyl pyrophosphate synthetase	0.001183
K03529	K03529: chromosome segregation protein	0.000382588
K00803	K00803: alkyldihydroxyacetonephosphate synthase	5.64744e-05
K10538	K10538: L-arabinose transport system permease protein	0.000101314
K00800	K00800: 3-phosphoshikimate 1-carboxyvinyltransferase	0.000594876
K08313	K08313: fructose-6-phosphate aldolase 1	2.66485e-05
K08312	K08312: ADP-ribose diphosphatase	1.60403e-05
K08311	K08311: putative (di)nucleoside polyphosphate hydrolase	1.85476e-05
K08310	K08310: dATP pyrophosphohydrolase	0.000134996
K08317	K08317: putative oxidoreductase	3.58208e-05
K08316	K08316: ribosomal RNA small subunit methyltransferase D	0.000242952
K08314	K08314: fructose-6-phosphate aldolase 2	7.50077e-06
K08319	K08319: putative dehydrogenase	3.64303e-15
K08318	K08318: putative dehydrogenase	6.59577e-06
K02404	K02404: flagellar biosynthesis protein FlhF	0.000111862
K05783	K05783: 1,6-dihydroxycyclohexa-2,4-diene-1-carboxylate dehydrogenase	1.21373e-05
K05782	K05782: benzoate membrane transport protein	1.12196e-05
K05781	K05781: putative phosphonate transport system ATP-binding protein	2.41631e-05
K05780	K05780: putative phosphonate transport system ATP-binding protein	9.61845e-06
K05787	K05787: DNA-binding protein HU-alpha	7.78042e-05
K05786	K05786: chloramphenicol-sensitive protein RarD	7.41343e-05
K05785	K05785: transcriptional antiterminator RfaH	1.48421e-05
K14392	K14392	2.30598e-05
K14393	K14393	0.000109941
K05788	K05788: integration host factor subunit beta	0.000358955
K02409	K02409: flagellar M-ring protein FliF	6.12515e-05
K02408	K02408: flagellar hook-basal body complex protein FliE	0.000176139
K01689	K01689: enolase	0.00172829
K02401	K02401: flagellar biosynthetic protein FlhB	0.000163317
K02400	K02400: flagellar biosynthesis protein FlhA	0.000215104
K01684	K01684: galactonate dehydratase	9.89293e-05
K02402	K02402: flagellar transcriptional activator FlhC	6.39096e-06
K02405	K02405: RNA polymerase sigma factor for flagellar operon FliA	0.000289499
K05364	K05364: peptidoglycan glycosyltransferase	5.09481e-05
K05367	K05367: penicillin-binding protein 1C	0.000196018
K05366	K05366: penicillin-binding protein 1A	0.000478803
K02799	K02799: PTS system, mannitol-specific IIB component	6.58227e-05
K02798	K02798: PTS system, mannitol-specific IIA component	9.92685e-05
K01442	K01442: choloylglycine hydrolase	0.000109595
K01443	K01443: N-acetylglucosamine-6-phosphate deacetylase	0.000527562
K01447	K01447: N-acetylmuramoyl-L-alanine amidase	7.85138e-05
K02791	K02791: PTS system, maltose and glucose-specific IIC component	2.32209e-05
K02790	K02790: PTS system, maltose and glucose-specific IIB component	2.32209e-05
K02793	K02793: PTS system, mannose-specific IIA component	8.67532e-05
K12137	K12137: hydrogenase-4 component B	9.36713e-05
K02795	K02795: PTS system, mannose-specific IIC component	0.000159902
K02794	K02794: PTS system, mannose-specific IIB component	9.08157e-05
K02796	K02796: PTS system, mannose-specific IID component	0.000114166
K13049	K13049	1.34879e-05
K13747	K13747	0.000157163
K02888	K02888: large subunit ribosomal protein L21	0.000594655
K13735	K13735	8.30308e-06
K02884	K02884: large subunit ribosomal protein L19	0.00104349
K02887	K02887: large subunit ribosomal protein L20	0.00107856
K13040	K13040	5.81929e-06
K13731	K13731	2.36781e-06
K13730	K13730	5.81733e-05
K02883	K02883: large subunit ribosomal protein L18e	0.000522949
K04564	K04564: superoxide dismutase, Fe-Mn family	0.000800039
K04565	K04565: Cu/Zn superoxide dismutase	4.94909e-05
K02069	K02069: putative ABC transport system permease protein	0.000226935
K04567	K04567: lysyl-tRNA synthetase, class II	0.00101703
K01040	K01040: glutaconate CoA-transferase, subunit B	0.000203029
K04561	K04561: nitric-oxide reductase, cytochrome b-containing subunit I	6.43984e-05
K01448	K01448: N-acetylmuramoyl-L-alanine amidase	0.000772916
K05568	K05568: multicomponent Na+:H+ antiporter subunit D	0.000191784
K05567	K05567: multicomponent Na+:H+ antiporter subunit C	0.000129614
K05566	K05566: multicomponent Na+:H+ antiporter subunit B	0.000156011
K05565	K05565: multicomponent Na+:H+ antiporter subunit A	4.71378e-05
K02060	K02060: putative sulfate transport system permease protein	1.42979e-07
K05563	K05563: multicomponent K+:H+ antiporter subunit F	8.44401e-06
K02066	K02066: putative ABC transport system permease protein	0.000367441
K02065	K02065: putative ABC transport system ATP-binding protein	0.000370488
K05560	K05560: multicomponent K+:H+ antiporter subunit C	4.90304e-06
K02535	K02535: UDP-3-O-[3-hydroxymyristoyl] N-acetylglucosamine deacetylase	0.000252604
K02242	K02242: competence protein ComFC	0.000461169
K02240	K02240: competence protein ComFA	1.52774e-05
K02530	K02530: DeoR family transcriptional regulator, lactose phosphotransferase	0.000103863
K02245	K02245: competence protein ComGC	4.35666e-05
K02244	K02244: competence protein ComGB	4.34908e-06
K03330	K03330: glutamyl-tRNA(Gln) amidotransferase subunit E	0.000230553
K03332	K03332: fructan beta-fructosidase	4.09514e-06
K03333	K03333: cholesterol oxidase	2.80469e-06
K03335	K03335: inosose dehydratase	6.40438e-05
K03336	K03336: 3D-(3,5/4)-trihydroxycyclohexane-1,2-dione hydrolase	4.77291e-05
K03337	K03337: 5-deoxy-glucuronate isomerase	3.91411e-05
K02081	K02081: DeoR family transcriptional regulator, aga operon transcriptional	0.000162966
K02080	K02080: galactosamine-6-phosphate isomerase	6.73424e-08
K02083	K02083: allantoate deiminase	1.51523e-05
K02082	K02082: tagatose-6-phosphate ketose/aldose isomerase	2.69739e-05
K12956	K12956	4.84946e-05
K12957	K12957	4.75661e-06
K12954	K12954	1.78882e-05
K12955	K12955	8.21499e-06
K12952	K12952	5.81621e-06
K12953	K12953	7.64957e-05
K12950	K12950	4.56035e-05
K12951	K12951	1.25249e-05
K03429	K03429: 1,2-diacylglycerol 3-glucosyltransferase	6.89484e-05
K03424	K03424: TatD DNase family protein	0.000796147
K03425	K03425: sec-independent protein translocase protein TatE	2.55476e-12
K03426	K03426: NAD+ diphosphatase	0.000215822
K03427	K03427: type I restriction enzyme M protein	0.00111153
K03420	K03420: proteasome regulatory subunit	0.000278267
K03933	K03933: chitin-binding protein	4.85396e-05
K03930	K03930: putative tributyrin esterase	0.000194376
K03931	K03931: putative isomerase [CAZy:GH63]	5.35592e-05
K03204	K03204: type IV secretion system protein VirB9	1.29903e-27
K03205	K03205: type IV secretion system protein VirD4	2.30431e-05
K03752	K03752: molybdopterin-guanine dinucleotide biosynthesis protein A	3.18386e-16
K03753	K03753: molybdopterin-guanine dinucleotide biosynthesis protein B	4.36462e-05
K03750	K03750: molybdopterin biosynthesis protein MoeA	0.000481366
K03203	K03203: type IV secretion system protein VirB8	6.57148e-06
K03758	K03758: arginine:ornithine antiporter	5.07698e-05
K03759	K03759: arginine:agmatine antiporter	2.38418e-06
K06148	K06148: ATP-binding cassette, subfamily C, bacterial	0.000519424
K06149	K06149: universal stress protein A	2.05755e-05
K02339	K02339: DNA polymerase III subunit chi	1.56128e-33
K02338	K02338: DNA polymerase III subunit beta	0.000281977
K02337	K02337: DNA polymerase III subunit alpha	0.000743489
K02336	K02336: DNA polymerase II	0.0001418
K06146	K06146: LacI family transcriptional regulator, gluconate utilization system	1.39595e-05
K06147	K06147: ATP-binding cassette, subfamily B, bacterial	0.00342296
K06140	K06140: regulator of nucleoside diphosphate kinase	5.93959e-05
K06141	K06141: MFS transporter, TsgA protein	3.79574e-06
K06142	K06142: outer membrane protein	6.88334e-05
K03265	K03265: peptide chain release factor eRF subunit 1	0.000211564
K02563	K02563: UDP-N-acetylglucosamine--N-acetylmuramyl-(pentapeptide)	0.000729116
K07741	K07741: anti-repressor protein	6.53656e-05
K09461	K09461: anthraniloyl-CoA monooxygenase	3.18357e-05
K03688	K03688: ubiquinone biosynthesis protein	0.000196319
K03680	K03680: translation initiation factor eIF-2B delta subunit	9.752e-05
K02618	K02618: phenylacetic acid degradation protein	2.19049e-06
K03684	K03684: ribonuclease D	4.29874e-05
K03685	K03685: ribonuclease III	0.000878413
K03686	K03686: molecular chaperone DnaJ	0.00168173
K03687	K03687: molecular chaperone GrpE	0.000630683
K10793	K10793: D-proline reductase (dithiol) PrdA	6.36879e-06
K02968	K02968: small subunit ribosomal protein S20	0.000442859
K06204	K06204: DnaK suppressor protein	4.47313e-05
K07776	K07776: two-component system, OmpR family, response regulator RegX3	0.000145784
K07301	K07301	0.000402161
K03111	K03111: single-strand DNA-binding protein	0.00104133
K07303	K07303: isoquinoline 1-oxidoreductase, beta subunit	2.28534e-05
K07302	K07302: isoquinoline 1-oxidoreductase, alpha subunit	2.03152e-05
K07305	K07305: peptide-methionine (R)-S-oxide reductase	0.000645001
K07304	K07304: peptide-methionine (S)-S-oxide reductase	0.000532716
K07307	K07307: anaerobic dimethyl sulfoxide reductase subunit B (DMSO reductase	0.000258315
K07306	K07306: anaerobic dimethyl sulfoxide reductase subunit A	0.000103624
K07309	K07309: putative dimethyl sulfoxide reductase subunit YnfE	3.88617e-05
K07308	K07308: anaerobic dimethyl sulfoxide reductase subunit C (DMSO reductase	2.64628e-05
K13953	K13953	0.000158231
K13955	K13955	4.31262e-07
K13954	K13954	9.21912e-05
K00077	K00077: 2-dehydropantoate 2-reductase	0.000367118
K03110	K03110: signal recognition particle receptor	0.000907278
K02965	K02965: small subunit ribosomal protein S19	0.00174576
K07772	K07772: two-component system, OmpR family, torCAD operon response regulator	1.17226e-05
K06390	K06390: stage III sporulation protein AA	0.000131399
K00703	K00703: starch synthase	0.000353823
K07773	K07773: two-component system, OmpR family, aerobic respiration control	4.39458e-05
K03112	K03112: DamX protein	3.48534e-06
K12552	K12552: penicillin-binding protein 1	1.65224e-05
K12553	K12553: penicillin-binding protein 3	1.2087e-06
K11609	K11609: beta-ketoacyl ACP synthase	8.98148e-06
K12551	K12551: transglycosylase	1.6148e-06
K12556	K12556: penicillin-binding protein 2X	3.65725e-05
K05939	K05939: acyl-[acyl-carrier-protein]-phospholipid O-acyltransferase	5.54035e-05
K02224	K02224: hydrogenobyrinic acid a,c-diamide synthase	0.000501118
K02613	K02613: phenylacetic acid degradation NADH oxidoreductase	1.2228e-05
K11607	K11607: manganese/iron transport system ATP-binding protein	5.8785e-05
K11606	K11606: manganese/iron transport system permease protein	8.31875e-05
K11605	K11605: manganese/iron transport system permease protein	7.43255e-07
K11604	K11604: manganese/iron transport system substrate-binding protein	2.33723e-05
K10558	K10558: AI-2 transport system ATP-binding protein	5.43388e-05
K03116	K03116: sec-independent protein translocase protein TatA	0.000638188
K10550	K10550: D-allose transport system permease protein	9.38555e-06
K10551	K10551: D-allose transport system ATP-binding protein	2.15835e-05
K03117	K03117: sec-independent protein translocase protein TatB	5.41146e-05
K10555	K10555: AI-2 transport system substrate-binding protein	2.11167e-05
K10556	K10556: AI-2 transport system permease protein	3.59989e-05
K10557	K10557: AI-2 transport system permease protein	4.61498e-05
K03118	K03118: sec-independent protein translocase protein TatC	0.000165457
K03119	K03119: taurine dioxygenase	9.97373e-06
K06892	K06892	9.12786e-06
K06893	K06893	1.01482e-05
K06890	K06890	0.000143149
K06891	K06891: ATP-dependent Clp protease adaptor protein ClpS	9.90739e-06
K06896	K06896	8.12503e-05
K06897	K06897	0.000216652
K06894	K06894	2.09259e-05
K06895	K06895	2.86283e-05
K07235	K07235: tRNA 2-thiouridine synthesizing protein D	1.16401e-05
K07234	K07234: uncharacterized protein involved in response to NO	3.6032e-06
K07237	K07237: tRNA 2-thiouridine synthesizing protein B	1.57024e-05
K07236	K07236: tRNA 2-thiouridine synthesizing protein C	1.5785e-05
K07231	K07231: putative iron-regulated protein	6.78183e-06
K07230	K07230	1.70481e-05
K09686	K09686: antibiotic transport system permease protein	0.00060286
K09687	K09687: antibiotic transport system ATP-binding protein	0.00310073
K09684	K09684: purine catabolism regulatory protein	4.93805e-05
K09685	K09685: purine operon repressor	2.7805e-05
K09682	K09682: MarR family transcriptional regulator, protease production	8.06336e-06
K09680	K09680: type II pantothenate kinase	1.08096e-05
K09681	K09681: LysR family transcriptional regulator, transcription activator of	4.16765e-05
K11779	K11779: FO synthase	4.69719e-05
K09689	K09689: capsular polysaccharide transport system ATP-binding protein	2.96279e-05
K06208	K06208: chorismate mutase	3.59227e-05
K11395	K11395: 2-keto-3-deoxy-gluconate aldolase	3.4231e-11
K11391	K11391: ribosomal RNA large subunit methyltransferase G	3.94631e-06
K11392	K11392: ribosomal RNA small subunit methyltransferase F	5.73132e-05
K05966	K05966: triphosphoribosyl-dephospho-CoA synthase	1.46876e-05
K11159	K11159: carotenoid cleavage dioxygenase	2.97156e-06
K05964	K05964: holo-ACP synthase	5.44276e-05
K00494	K00494: alkanal monooxygenase (FMN-linked)	3.54279e-05
K00496	K00496: alkane 1-monooxygenase	3.22718e-09
K00492	K00492	5.48247e-07
K00493	K00493: unspecific monooxygenase	6.4648e-06
K08641	K08641: D-alanyl-D-alanine dipeptidase	0.000125548
K00658	K00658: 2-oxoglutarate dehydrogenase E2 component (dihydrolipoamide	0.000196043
K08642	K08642: LasA protease	1.42749e-05
K00656	K00656: formate C-acetyltransferase	0.000521107
K00657	K00657: diamine N-acetyltransferase	0.000118315
K05365	K05365: penicillin-binding protein 1B	9.85747e-05
K00655	K00655: 1-acyl-sn-glycerol-3-phosphate acyltransferase	0.000325943
K00652	K00652: 8-amino-7-oxononanoate synthase	0.000223474
K00301	K00301: sarcosine oxidase	1.53342e-05
K00302	K00302: sarcosine oxidase, subunit alpha	5.66357e-05
K00651	K00651: homoserine O-succinyltransferase	0.000297399
K07129	K07129	0.000159783
K06434	K06434: small acid-soluble spore protein (thioredoxin-like protein)	9.75183e-05
K00373	K00373: nitrate reductase 1, delta subunit	3.024e-05
K06438	K06438: similar to stage IV sporulation protein	2.37429e-05
K07120	K07120	1.83897e-06
K00372	K00372: nitrate reductase catalytic subunit	7.64982e-05
K07124	K07124	0.000339321
K07126	K07126	0.000519194
K01358	K01358: ATP-dependent Clp protease, protease subunit	0.00134698
K02110	K02110: F-type H+-transporting ATPase subunit c	0.000446084
K01870	K01870: isoleucyl-tRNA synthetase	0.00112027
K01873	K01873: valyl-tRNA synthetase	0.00104584
K01872	K01872: alanyl-tRNA synthetase	0.0011112
K01875	K01875: seryl-tRNA synthetase	0.0011968
K01874	K01874: methionyl-tRNA synthetase	0.00114344
K01876	K01876: aspartyl-tRNA synthetase	0.00147842
K01879	K01879: glycyl-tRNA synthetase beta chain	0.000193999
K01878	K01878: glycyl-tRNA synthetase alpha chain	0.000424645
K06956	K06956	6.21624e-05
K04021	K04021: aldehyde dehydrogenase	3.36811e-05
K04020	K04020: ethanolamine utilization protein EutD	1.97251e-05
K04023	K04023: ethanolamine transporter	2.64528e-05
K04022	K04022: alcohol dehydrogenase	7.32921e-05
K04025	K04025: ethanolamine utilization protein EutK	8.80042e-06
K04024	K04024: ethanolamine utilization protein EutJ	5.2617e-05
K04027	K04027: ethanolamine utilization protein EutM	0.000532866
K04026	K04026: ethanolamine utilization protein EutL	3.43715e-05
K04029	K04029: ethanolamine utilization protein EutP	4.16415e-05
K04028	K04028: ethanolamine utilization protein EutN	0.000102492
K00018	K00018: glycerate dehydrogenase	0.000198834
K00019	K00019: 3-hydroxybutyrate dehydrogenase	0.000330377
K11608	K11608: beta-ketoacyl ACP synthase	1.48898e-06
K07051	K07051	5.16169e-06
K07050	K07050	5.20611e-05
K07053	K07053	0.000446446
K07052	K07052	0.000168416
K00010	K00010: myo-inositol 2-dehydrogenase	0.000360763
K00012	K00012: UDPglucose 6-dehydrogenase	0.000915424
K00013	K00013: histidinol dehydrogenase	0.000981955
K00014	K00014: shikimate 5-dehydrogenase	0.000479624
K07058	K07058	0.000196581
K00016	K00016: L-lactate dehydrogenase	0.000209606
K07679	K07679: two-component system, NarL family, sensor histidine kinase EvgS	0.000129221
K09065	K09065: N-acetylornithine carbamoyltransferase	7.73374e-07
K12555	K12555: penicillin-binding protein 2A	7.09698e-05
K05311	K05311: central glycolytic genes regulator	2.24408e-05
K08256	K08256: phosphatidylinositol alpha-mannosyltransferase	5.23524e-05
K08255	K08255: CoA-disulfide reductase	2.07075e-06
K02867	K02867: large subunit ribosomal protein L11	0.00111929
K10040	K10040: putative glutamine transport system permease protein	0.000142896
K08259	K08259: lysostaphin	4.72065e-06
K14257	K14257	2.54996e-06
K00274	K00274: monoamine oxidase	4.7202e-05
K00275	K00275: pyridoxamine 5'-phosphate oxidase	0.000111729
K00276	K00276: primary-amine oxidase	1.97057e-06
K04798	K04798: prefoldin beta subunit	1.19338e-05
K00271	K00271: valine dehydrogenase	1.92129e-08
K00273	K00273: D-amino-acid oxidase	4.31545e-06
K04793	K04793: mycobactin lysine-N-oxygenase	3.46108e-06
K04792	K04792: mycobactin peptide synthetase MbtF	1.01208e-05
K04791	K04791: mycobactin polyketide synthetase MbtD	1.31046e-06
K04790	K04790: mycobactin polyketide synthetase MbtC	3.35974e-06
K00278	K00278: L-aspartate oxidase	0.000652131
K04795	K04795: fibrillarin-like pre-rRNA processing protein	0.000159696
K04794	K04794: peptidyl-tRNA hydrolase, PTH2 family	0.000272902
K01308	K01308: g-D-glutamyl-meso-diaminopimelate peptidase	2.76516e-05
K00472	K00472: prolyl 4-hydroxylase	5.16169e-06
K01305	K01305: beta-aspartyl-peptidase	0.000178149
K01304	K01304: pyroglutamyl-peptidase	8.9366e-05
K02658	K02658: twitching motility two-component system response regulator PilH	0.000174401
K02659	K02659: twitching motility protein PilI	8.54486e-06
K04776	K04776: vibriobactin-specific 2,3-dihydroxybenzoate-AMP ligase	5.45984e-08
K04771	K04771: serine protease Do	0.000111812
K05851	K05851: adenylate cyclase, class 1	1.05471e-05
K04773	K04773: protease IV	0.000468319
K04772	K04772: serine protease DegQ	7.87371e-05
K02650	K02650: type IV pilus assembly protein PilA	0.000285615
K02651	K02651: pilus assembly protein Flp/PilA	2.57194e-05
K02652	K02652: type IV pilus assembly protein PilB	0.00011457
K02653	K02653: type IV pilus assembly protein PilC	0.000325527
K02654	K02654: leader peptidase (prepilin peptidase) / N-methyltransferase	0.00024849
K02655	K02655: type IV pilus assembly protein PilE	4.28141e-05
K02656	K02656: type IV pilus assembly protein PilF	1.75824e-05
K02657	K02657: twitching motility two-component system response regulator PilG	4.14402e-05
K00878	K00878: hydroxyethylthiazole kinase	0.000468382
K00879	K00879: L-fuculokinase	0.000142006
K13638	K13638	0.000161179
K13639	K13639	7.83271e-05
K00872	K00872: homoserine kinase	0.000125661
K00873	K00873: pyruvate kinase	0.000504151
K13636	K13636	3.58098e-05
K13637	K13637	4.34854e-05
K00876	K00876: uridine kinase	0.000914407
K13631	K13631	4.18048e-05
K00874	K00874: 2-dehydro-3-deoxygluconokinase	0.000367131
K04487	K04487: cysteine desulfurase	0.00163115
K04486	K04486: histidinol-phosphatase (PHP family)	3.33413e-05
K04485	K04485: DNA repair protein RadA/Sms	0.000909994
K04484	K04484: DNA repair protein RadB	0.000171931
K04483	K04483: DNA repair protein RadA	0.0003514
K04488	K04488: nitrogen fixation protein NifU and related proteins	0.00148072
K10211	K10211: 4,4'-diaponeurosporenoate glycosyltransferase	0.000106584
K01274	K01274: D-alanyl-D-alanine dipeptidase	6.19824e-05
K01273	K01273: membrane dipeptidase	0.000249653
K01271	K01271: X-Pro dipeptidase	0.00017127
K05779	K05779: putative thiamine transport system ATP-binding protein	9.23187e-06
K05776	K05776: molybdate transport system ATP-binding protein	3.12565e-05
K02045	K02045: sulfate transport system ATP-binding protein	0.000302443
K05774	K05774: ribose 1,5-bisphosphokinase	2.929e-15
K05772	K05772: putative tungstate transport system substrate-binding protein	0.000488079
K05773	K05773: putative tungstate transport system permease protein	0.000329044
K02044	K02044: phosphonate transport system substrate-binding protein	2.71058e-05
K01699	K01699: diol dehydratase	3.23117e-05
K01698	K01698: porphobilinogen synthase	0.000723324
K01695	K01695: tryptophan synthase alpha chain	0.000357703
K01697	K01697: cystathionine beta-synthase	0.000126991
K01696	K01696: tryptophan synthase beta chain	0.000919195
K01690	K01690: phosphogluconate dehydratase	1.00417e-05
K01693	K01693: imidazoleglycerol-phosphate dehydratase	0.000637896
[truncated: 2,360 more rows]

## Sheet: Selected ECs
KO	EC	KO Desc	Rel, Abundance
K00100	1.1.1.-	K00100	0.0010285
K02474	1.1.1.-	K02474: UDP-N-acetyl-D-galactosamine dehydrogenase	0.00025911
K05556	1.1.1.-	K05556: hydroxylacyl-CoA dehydrogenase	3.61624e-23
K06607	1.1.1.-	K06607: myo-inositol catabolism protein IolS	0.000100259
K07535	1.1.1.-	K07535: 2-hydroxycyclohexanecarboxyl-CoA dehydrogenase	5.53631e-05
K08322	1.1.1.-	K08322: starvation sensing protein RspB	1.75269e-05
K09019	1.1.1.-
K12420	1.1.1.-	K12420: ketoacyl reductase	1.38306e-05
K13574	1.1.1.-	K13574	4.1322e-06
K16066	1.1.1.-
K00100	1.1.1.-	K00100	0.0010285
K02474	1.1.1.-	K02474: UDP-N-acetyl-D-galactosamine dehydrogenase	0.00025911
K05556	1.1.1.-	K05556: hydroxylacyl-CoA dehydrogenase	3.61624e-23
K06607	1.1.1.-	K06607: myo-inositol catabolism protein IolS	0.000100259
K07535	1.1.1.-	K07535: 2-hydroxycyclohexanecarboxyl-CoA dehydrogenase	5.53631e-05
K08322	1.1.1.-	K08322: starvation sensing protein RspB	1.75269e-05
K09019	1.1.1.-
K12420	1.1.1.-	K12420: ketoacyl reductase	1.38306e-05
K13574	1.1.1.-	K13574	4.1322e-06
K16066	1.1.1.-
K00001	1.1.1.1	K00001: alcohol dehydrogenase	0.000231841
K11440	1.1.1.1	K11440: choline dehydrogenase	5.68824e-05
K13953	1.1.1.1	K13953	0.000158231
K13954	1.1.1.1	K13954	9.21912e-05
K00074	1.1.1.157	K00074: 3-hydroxybutyryl-CoA dehydrogenase	0.000572761
K00016	1.1.1.27	K00016: L-lactate dehydrogenase	0.000209606
K00016	1.1.1.27	K00016: L-lactate dehydrogenase	0.000209606
K03777	1.1.1.28	K03777: D-lactate dehydrogenase	1.50441e-05
K03778	1.1.1.28	K03778: D-lactate dehydrogenase	0.000504914
K00121	1.1.1.284 1.1.1.1	K00121: S-(hydroxymethyl)glutathione dehydrogenase	0.000137874
K00023	1.1.1.36	K00023: acetoacetyl-CoA reductase	0.000118554
K00024	1.1.1.37	K00024	0.000277393
K00024	1.1.1.37	K00024	0.000277393
K00024	1.1.1.37	K00024	0.000277393
K00032	1.1.1.43	K00032: phosphogluconate 2-dehydrogenase	1.44561e-05
K00036	1.1.1.49	K00036: glucose-6-phosphate 1-dehydrogenase	0.000237845
K00043	1.1.1.61	K00043: 4-hydroxybutyrate dehydrogenase	1.54131e-05
K08318	1.1.1.61	K08318: putative dehydrogenase	6.59577e-06
K18120	1.1.1.61
K00043	1.1.1.61	K00043: 4-hydroxybutyrate dehydrogenase	1.54131e-05
K08318	1.1.1.61	K08318: putative dehydrogenase	6.59577e-06
K18120	1.1.1.61
K00532	1.12.7.2
K00532	1.12.7.2
K00532	1.12.7.2
K06281	1.12.99.6	K06281: hydrogenase large subunit	0.000283235
K06282	1.12.99.6	K06282: hydrogenase small subunit	0.000193531
K06281	1.12.99.6	K06281: hydrogenase large subunit	0.000283235
K06282	1.12.99.6	K06282: hydrogenase small subunit	0.000193531
K05297	1.18.1.1	K05297: rubredoxin-NAD+ reductase	8.16674e-06
K00528	1.18.1.2	K00528: ferredoxin--NADP+ reductase	0.000810032
K00529	1.18.1.3	K00529: ferredoxin--NAD+ reductase	5.12902e-05
K15765	1.18.1.3
K00529	1.18.1.3	K00529: ferredoxin--NAD+ reductase	5.12902e-05
K15765	1.18.1.3
K00138	1.2.1.-	K00138: lactaldehyde dehydrogenase	7.0076e-06
K00155	1.2.1.-	K00155	4.11116e-05
K09472	1.2.1.-	K09472: gamma-glutamyl-gamma-aminobutyraldehyde dehydrogenase	5.79662e-05
K04072	1.2.1.10 1.1.1.1	K04072: acetaldehyde dehydrogenase	0.000333989
K00134	1.2.1.12	K00134: glyceraldehyde 3-phosphate dehydrogenase	0.00127776
K08324	1.2.1.16 1.2.1.24	K08324: aldehyde dehydrogenase family protein	6.47239e-06
K00122	1.2.1.2	K00122: formate dehydrogenase	3.98817e-06
K00123	1.2.1.2	K00123: formate dehydrogenase, alpha subunit	0.000888763
K00126	1.2.1.2	K00126: formate dehydrogenase, delta subunit	4.08082e-12
K00122	1.2.1.2	K00122: formate dehydrogenase	3.98817e-06
K00123	1.2.1.2	K00123: formate dehydrogenase, alpha subunit	0.000888763
K00126	1.2.1.2	K00126: formate dehydrogenase, delta subunit	4.08082e-12
K00122	1.2.1.2	K00122: formate dehydrogenase	3.98817e-06
K00123	1.2.1.2	K00123: formate dehydrogenase, alpha subunit	0.000888763
K00126	1.2.1.2	K00126: formate dehydrogenase, delta subunit	4.08082e-12
K12254	1.2.1.54 1.2.1.-	K12254: 4-guanidinobutyraldehyde dehydrogenase / NAD-dependent aldehyde	1.092e-06
K18119	1.2.1.76
K00158	1.2.3.3	K00158: pyruvate oxidase	6.57985e-05
K00169	1.2.7.1	K00169: pyruvate ferredoxin oxidoreductase, alpha subunit	0.000136315
K00170	1.2.7.1	K00170: pyruvate ferredoxin oxidoreductase, beta subunit	0.000194783
K00171	1.2.7.1	K00171: pyruvate ferredoxin oxidoreductase, delta subunit	0.000200526
K00172	1.2.7.1	K00172: pyruvate ferredoxin oxidoreductase, gamma subunit	5.28053e-05
K00169	1.2.7.1	K00169: pyruvate ferredoxin oxidoreductase, alpha subunit	0.000136315
K00170	1.2.7.1	K00170: pyruvate ferredoxin oxidoreductase, beta subunit	0.000194783
K00171	1.2.7.1	K00171: pyruvate ferredoxin oxidoreductase, delta subunit	0.000200526
K00172	1.2.7.1	K00172: pyruvate ferredoxin oxidoreductase, gamma subunit	5.28053e-05
K03738	1.2.7.5	K03738: aldehyde:ferredoxin oxidoreductase	0.000125749
K03518	1.2.99.2	K03518: carbon-monoxide dehydrogenase small subunit	0.00071569
K03519	1.2.99.2	K03519: carbon-monoxide dehydrogenase medium subunit	2.30834e-05
K03520	1.2.99.2	K03520: carbon-monoxide dehydrogenase large subunit	4.85166e-05
K00198	1.2.99.2 1.2.7.4	K00198: carbon-monoxide dehydrogenase catalytic subunit	7.12098e-05
K00198	1.2.99.2 1.2.7.4	K00198: carbon-monoxide dehydrogenase catalytic subunit	7.12098e-05
K11261	1.2.99.5	K11261: formylmethanofuran dehydrogenase subunit E	0.000462948
K11261	1.2.99.5	K11261: formylmethanofuran dehydrogenase subunit E	0.000462948
K10670	1.21.4.2	K10670: glycine reductase	0.000502368
K00239	1.3.5.1	K00239: succinate dehydrogenase flavoprotein subunit	0.000458052
K00240	1.3.5.1	K00240: succinate dehydrogenase iron-sulfur protein	0.000322368
K00248	1.3.8.1	K00248: butyryl-CoA dehydrogenase	0.00029792
K00259	1.4.1.1	K00259: alanine dehydrogenase	0.000357052
K00260	1.4.1.2	K00260: glutamate dehydrogenase	8.88763e-05
K15371	1.4.1.2
K00260	1.4.1.2	K00260: glutamate dehydrogenase	8.88763e-05
K15371	1.4.1.2
K06989	1.4.1.21	K06989: aspartate dehydrogenase	0.000157946
K00263	1.4.1.9	K00263: leucine dehydrogenase	2.724e-09
K00281	1.4.4.2	K00281	0.000274243
K00282	1.4.4.2	K00282: glycine dehydrogenase subunit 1	0.000518003
K00283	1.4.4.2	K00283: glycine dehydrogenase subunit 2	0.000587363
K01491	1.5.1.5 3.5.4.9	K01491: methenyltetrahydrofolate cyclohydrolase	0.00100487
K01491	1.5.1.5 3.5.4.9	K01491: methenyltetrahydrofolate cyclohydrolase	0.00100487
K00599	2.1.1.-	K00599	0.00145235
K02493	2.1.1.-	K02493: HemK protein	0.000603089
K02533	2.1.1.-	K02533: tRNA/rRNA methyltransferase	0.000158471
K02687	2.1.1.-	K02687: ribosomal protein L11 methyltransferase	0.000491459
K03214	2.1.1.-	K03214: RNA methyltransferase, TrmH family	6.14136e-05
K05303	2.1.1.-
K07055	2.1.1.-	K07055	0.000277355
K07444	2.1.1.-	K07444: putative N6-adenine-specific DNA methylase	0.000355008
K13530	2.1.1.-	K13530	3.25555e-05
K15256	2.1.1.-
K15257	2.1.1.-
K17462	2.1.1.-
K00599	2.1.1.-	K00599	0.00145235
K02493	2.1.1.-	K02493: HemK protein	0.000603089
K02533	2.1.1.-	K02533: tRNA/rRNA methyltransferase	0.000158471
K02687	2.1.1.-	K02687: ribosomal protein L11 methyltransferase	0.000491459
K03214	2.1.1.-	K03214: RNA methyltransferase, TrmH family	6.14136e-05
K05303	2.1.1.-
K07055	2.1.1.-	K07055	0.000277355
K07444	2.1.1.-	K07444: putative N6-adenine-specific DNA methylase	0.000355008
K13530	2.1.1.-	K13530	3.25555e-05
K15256	2.1.1.-
K15257	2.1.1.-
K17462	2.1.1.-
K13540	2.1.1.130 2.1.1.131	K13540	5.12494e-05
K03394	2.1.1.130 2.1.1.151	K03394: cobalt-factor-2 C20-methyltransferase	0.000222355
K05934	2.1.1.131	K05934: precorrin-3B C17-methyltransferase	0.000466465
K08316	2.1.1.171	K08316: ribosomal RNA small subunit methyltransferase D	0.000242952
K06970	2.1.1.181	K06970: ribosomal RNA large subunit methyltransferase F	8.96406e-06
K06969	2.1.1.191	K06969: putative SAM-dependent methyltransferase	0.000424528
K00194	2.1.1.245
K00197	2.1.1.245
K14080	2.1.1.246
K15023	2.1.1.258
K00680	2.3.1.-	K00680	0.00046374
K02517	2.3.1.-	K02517: lipid A biosynthesis lauroyl acyltransferase	6.93747e-05
K02560	2.3.1.-
K02615	2.3.1.-	K02615: acetyl-CoA acetyltransferase	1.2053e-05
K03817	2.3.1.-	K03817: ribosomal-protein-serine acetyltransferase	4.90913e-05
K03818	2.3.1.-	K03818: putative colanic acid biosynthesis acetyltransferase WcaF	3.07034e-07
K03819	2.3.1.-	K03819: putative colanic acid biosynthesis acetyltransferase WcaB	1.36183e-05
K03820	2.3.1.-	K03820: apolipoprotein N-acyltransferase	0.000141698
K03821	2.3.1.-	K03821: polyhydroxyalkanoate synthase	5.37163e-05
K03824	2.3.1.-	K03824: putative acetyltransferase	4.38904e-05
K03825	2.3.1.-	K03825: putative acetyltransferase	5.34125e-05
K03826	2.3.1.-	K03826: putative acetyltransferase	2.83328e-05
K03827	2.3.1.-	K03827: putative acetyltransferase	0.000121322
K03828	2.3.1.-
K03829	2.3.1.-
K03830	2.3.1.-
K04766	2.3.1.-
K05551	2.3.1.-	K05551: 3-oxoacyl-ACP synthase I	1.21195e-05
K05552	2.3.1.-	K05552: 3-oxoacyl-ACP synthase II	1.29935e-06
K07389	2.3.1.-
K07550	2.3.1.-
K08280	2.3.1.-	K08280: lipopolysaccharide O-acetyltransferase	1.05594e-05
K09994	2.3.1.-
K10212	2.3.1.-	K10212: glycosyl-4,4'-diaponeurosporenoate acyltransferase	1.82702e-05
K11533	2.3.1.-	K11533: fatty acid synthase, bacteria type	9.72129e-06
K11608	2.3.1.-	K11608: beta-ketoacyl ACP synthase	1.48898e-06
K11609	2.3.1.-	K11609: beta-ketoacyl ACP synthase	8.98148e-06
K12973	2.3.1.-	K12973	1.57643e-05
K12974	2.3.1.-
K13663	2.3.1.-
K14667	2.3.1.-
K14668	2.3.1.-
K17840	2.3.1.-
K18234	2.3.1.-
K00680	2.3.1.-	K00680	0.00046374
K02517	2.3.1.-	K02517: lipid A biosynthesis lauroyl acyltransferase	6.93747e-05
K02560	2.3.1.-
K02615	2.3.1.-	K02615: acetyl-CoA acetyltransferase	1.2053e-05
K03817	2.3.1.-	K03817: ribosomal-protein-serine acetyltransferase	4.90913e-05
K03818	2.3.1.-	K03818: putative colanic acid biosynthesis acetyltransferase WcaF	3.07034e-07
K03819	2.3.1.-	K03819: putative colanic acid biosynthesis acetyltransferase WcaB	1.36183e-05
K03820	2.3.1.-	K03820: apolipoprotein N-acyltransferase	0.000141698
K03821	2.3.1.-	K03821: polyhydroxyalkanoate synthase	5.37163e-05
K03824	2.3.1.-	K03824: putative acetyltransferase	4.38904e-05
K03825	2.3.1.-	K03825: putative acetyltransferase	5.34125e-05
K03826	2.3.1.-	K03826: putative acetyltransferase	2.83328e-05
K03827	2.3.1.-	K03827: putative acetyltransferase	0.000121322
K03828	2.3.1.-
K03829	2.3.1.-
K03830	2.3.1.-
K04766	2.3.1.-
K05551	2.3.1.-	K05551: 3-oxoacyl-ACP synthase I	1.21195e-05
K05552	2.3.1.-	K05552: 3-oxoacyl-ACP synthase II	1.29935e-06
K07389	2.3.1.-
K07550	2.3.1.-
K08280	2.3.1.-	K08280: lipopolysaccharide O-acetyltransferase	1.05594e-05
K09994	2.3.1.-
K10212	2.3.1.-	K10212: glycosyl-4,4'-diaponeurosporenoate acyltransferase	1.82702e-05
K11533	2.3.1.-	K11533: fatty acid synthase, bacteria type	9.72129e-06
K11608	2.3.1.-	K11608: beta-ketoacyl ACP synthase	1.48898e-06
K11609	2.3.1.-	K11609: beta-ketoacyl ACP synthase	8.98148e-06
K12973	2.3.1.-	K12973	1.57643e-05
K12974	2.3.1.-
K13663	2.3.1.-
K14667	2.3.1.-
K14668	2.3.1.-
K17840	2.3.1.-
K18234	2.3.1.-
K14138	2.3.1.169
K14138	2.3.1.169
K00634	2.3.1.19	K00634: phosphate butyryltransferase	0.000381685
K00656	2.3.1.54	K00656: formate C-acetyltransferase	0.000521107
K00625	2.3.1.8	K00625: phosphate acetyltransferase	0.000756385
K13788	2.3.1.8	K13788	0.00012618
K15024	2.3.1.8
K00625	2.3.1.8	K00625: phosphate acetyltransferase	0.000756385
K13788	2.3.1.8	K13788	0.00012618
K15024	2.3.1.8
K00625	2.3.1.8	K00625: phosphate acetyltransferase	0.000756385
K13788	2.3.1.8	K13788	0.00012618
K15024	2.3.1.8
K00625	2.3.1.8	K00625: phosphate acetyltransferase	0.000756385
K13788	2.3.1.8	K13788	0.00012618
K15024	2.3.1.8
K00625	2.3.1.8	K00625: phosphate acetyltransferase	0.000756385
K13788	2.3.1.8	K13788	0.00012618
K15024	2.3.1.8
K00626	2.3.1.9	K00626: acetyl-CoA C-acetyltransferase	0.00149159
K00626	2.3.1.9	K00626: acetyl-CoA C-acetyltransferase	0.00149159
K00823	2.6.1.19	K00823: 4-aminobutyrate aminotransferase	6.9323e-05
K14268	2.6.1.48 2.6.1.19	K14268	8.21112e-06
K14260	2.6.1.66 2.6.1.2	K14260	0.000195742
K00850	2.7.1.11	K00850: 6-phosphofructokinase	0.00163938
K16370	2.7.1.11
K00850	2.7.1.11	K00850: 6-phosphofructokinase	0.00163938
K16370	2.7.1.11
K00851	2.7.1.12	K00851: gluconokinase	0.000168644
K11441	2.7.1.13	K11441: dehydrogluconokinase	1.30432e-05
K00852	2.7.1.15	K00852: ribokinase	0.000486287
K00853	2.7.1.16	K00853: L-ribulokinase	0.000202346
K00854	2.7.1.17	K00854: xylulokinase	0.000389744
K00855	2.7.1.19	K00855: phosphoribulokinase	2.41881e-19
K00873	2.7.1.40	K00873: pyruvate kinase	0.000504151
K00925	2.7.2.1	K00925: acetate kinase	0.00116917
K00925	2.7.2.1	K00925: acetate kinase	0.00116917
K00925	2.7.2.1	K00925: acetate kinase	0.00116917
K00925	2.7.2.1	K00925: acetate kinase	0.00116917
K00925	2.7.2.1	K00925: acetate kinase	0.00116917
K00927	2.7.2.3	K00927: phosphoglycerate kinase	0.00116892
K00929	2.7.2.7	K00929: butyrate kinase	0.000481249
K00956	2.7.7.4	K00956: sulfate adenylyltransferase subunit 1	2.80171e-05
K00957	2.7.7.4	K00957: sulfate adenylyltransferase subunit 2	0.000170169
K00958	2.7.7.4	K00958: sulfate adenylyltransferase	3.49886e-05
K01041	2.8.3.-	K01041	0.000184089
K18122	2.8.3.-
K01041	2.8.3.-	K01041	0.000184089
K18122	2.8.3.-
K01026	2.8.3.1
K01026	2.8.3.1
K01026	2.8.3.1
K01026	2.8.3.1
K01039	2.8.3.12	K01039: glutaconate CoA-transferase, subunit A	3.16267e-05
K01040	2.8.3.12	K01040: glutaconate CoA-transferase, subunit B	0.000203029
K07749	2.8.3.16	K07749: formyl-CoA transferase	0.000159543
K01034	2.8.3.8 2.8.3.9	K01034: acetate CoA-transferase alpha subunit	0.000139407
K01035	2.8.3.8 2.8.3.9	K01035: acetate CoA-transferase beta subunit	0.000150638
K01193	3.2.1.26	K01193: beta-fructofuranosidase	3.71231e-05
K02236	3.4.23.43 2.1.1.-	K02236: leader peptidase (prepilin peptidase) / N-methyltransferase	0.00013745
K02464	3.4.23.43 2.1.1.-	K02464: general secretion pathway protein O	4.11489e-06
K02654	3.4.23.43 2.1.1.-	K02654: leader peptidase (prepilin peptidase) / N-methyltransferase	0.00024849
K10966	3.4.23.43 2.1.1.-	K10966: toxin co-regulated pilus biosynthesis protein J [EC:3.4.23.43	3.39547e-06
K02236	3.4.23.43 2.1.1.-	K02236: leader peptidase (prepilin peptidase) / N-methyltransferase	0.00013745
K02464	3.4.23.43 2.1.1.-	K02464: general secretion pathway protein O	4.11489e-06
K02654	3.4.23.43 2.1.1.-	K02654: leader peptidase (prepilin peptidase) / N-methyltransferase	0.00024849
K10966	3.4.23.43 2.1.1.-	K10966: toxin co-regulated pilus biosynthesis protein J [EC:3.4.23.43	3.39547e-06
K09022	3.5.4.-	K09022: UPF0076 protein YjgF	9.55177e-05
K01499	3.5.4.27	K01499: methenyltetrahydromethanopterin cyclohydrolase	7.19482e-05
K01499	3.5.4.27	K01499: methenyltetrahydromethanopterin cyclohydrolase	7.19482e-05
K13541	3.7.1.12 2.1.1.131	K13541	2.31604e-05
K03182	4.1.1.-	K03182: 3-octaprenyl-4-hydroxybenzoate carboxy-lyase UbiD	0.0001022
K03186	4.1.1.-	K03186: 3-octaprenyl-4-hydroxybenzoate carboxy-lyase UbiX	0.000455418
K10622	4.1.1.-
K13727	4.1.1.-	K13727	2.57277e-05
K13747	4.1.1.-	K13747	0.000157163
K17942	4.1.1.-
K05921	4.1.1.68 5.3.3.-	K05921: 5-oxopent-3-ene-1,2,5-tricarboxylate decarboxylase /	0.000157134
K01623	4.1.2.13	K01623: fructose-bisphosphate aldolase, class I	0.000507539
K01624	4.1.2.13	K01624: fructose-bisphosphate aldolase, class II	0.000885263
K11645	4.1.2.13
K01726	4.2.1.-	K01726	3.87021e-06
K02509	4.2.1.-	K02509: 2-oxo-hept-3-ene-1,7-dioate hydratase	1.11743e-05
K05554	4.2.1.-
K01689	4.2.1.11	K01689: enolase	0.00172829
K01676	4.2.1.2	K01676: fumarate hydratase, class I	0.000298129
K01677	4.2.1.2	K01677: fumarate hydratase subunit alpha	0.000372262
K01678	4.2.1.2	K01678: fumarate hydratase subunit beta	0.000395502
K01679	4.2.1.2	K01679: fumarate hydratase, class II	0.000265342
K01676	4.2.1.2	K01676: fumarate hydratase, class I	0.000298129
K01677	4.2.1.2	K01677: fumarate hydratase subunit alpha	0.000372262
K01678	4.2.1.2	K01678: fumarate hydratase subunit beta	0.000395502
K01679	4.2.1.2	K01679: fumarate hydratase, class II	0.000265342
K01676	4.2.1.2	K01676: fumarate hydratase, class I	0.000298129
K01677	4.2.1.2	K01677: fumarate hydratase subunit alpha	0.000372262
K01678	4.2.1.2	K01678: fumarate hydratase subunit beta	0.000395502
K01679	4.2.1.2	K01679: fumarate hydratase, class II	0.000265342
K16218	4.2.3.118
K16218	4.2.3.118
K16218	4.2.3.118
K16218	4.2.3.118
K16218	4.2.3.118
K01744	4.3.1.1	K01744: aspartate ammonia-lyase	0.000257171
K04835	4.3.1.2	K04835: methylaspartate ammonia-lyase	0.000140656
K05606	5.1.99.1
K05606	5.1.99.1
K01812	5.3.1.12	K01812: glucuronate isomerase	0.000355302
K06041	5.3.1.13	K06041: arabinose-5-phosphate isomerase	0.000453426
K01813	5.3.1.14	K01813: L-rhamnose isomerase	0.00027295
K01814	5.3.1.16	K01814: phosphoribosylformimino-5-aminoimidazole carboxamide ribotide	0.000875829
K01815	5.3.1.17	K01815: 4-deoxy-L-threo-5-hexosulose-uronate ketol-isomerase	0.000187805
K01810	5.3.1.9	K01810: glucose-6-phosphate isomerase	0.000623653
K01828	5.3.3.-	K01828	0.000295172
K01846	5.4.99.1	K01846: methylaspartate mutase	4.80683e-05
K01847	5.4.99.2	K01847: methylmalonyl-CoA mutase	0.000486637
K01848	5.4.99.2	K01848: methylmalonyl-CoA mutase, N-terminal domain	9.70816e-05
K01849	5.4.99.2	K01849: methylmalonyl-CoA mutase, C-terminal domain	0.0001716
K11942	5.4.99.2	K11942: methylmalonyl-CoA mutase	5.55414e-05
K01847	5.4.99.2	K01847: methylmalonyl-CoA mutase	0.000486637
K01848	5.4.99.2	K01848: methylmalonyl-CoA mutase, N-terminal domain	9.70816e-05
K01849	5.4.99.2	K01849: methylmalonyl-CoA mutase, C-terminal domain	0.0001716
K11942	5.4.99.2	K11942: methylmalonyl-CoA mutase	5.55414e-05
K01938	6.3.4.3	K01938: formate--tetrahydrofolate ligase	0.000808061
K01938	6.3.4.3	K01938: formate--tetrahydrofolate ligase	0.000808061
